# Supplementary material for: Genomic Characterization of Sixteen Yersinia enterocolitica-Infecting Podoviruses of Pig Origin
Source: MDPI journal article supplement (doi:10.3390/v10040174), 2018-04-03
Supplement: s1 [file s1]

Supplementary material

# Genomic Characterization of Sixteen *Yersinia enterocolitica* –infecting Podoviruses of Pig Origin

Mabruka Salem <sup>1,2</sup>, Mikael Skurnik <sup>1,3,\*</sup>

<sup>1</sup> Department of Bacteriology and Immunology, Medicum, Research Programs Unit, Immunobiology, University of Helsinki, Helsinki, Finland

<sup>2</sup> Department of Microbiology, Faculty of Medicine, University of Benghazi, Benghazi, Libya; [Mabruka.salem@helsinki.fi](mailto:Mabruka.salem@helsinki.fi)

<sup>3</sup> Division of Clinical Microbiology, Helsinki University Hospital, HUSLAB, Helsinki, Finland; [mikael.skurnik@helsinki.fi](mailto:mikael.skurnik@helsinki.fi)

\* Correspondence: [mikael.skurnik@helsinki.fi](mailto:mikael.skurnik@helsinki.fi); Tel.: +358-2941-26464

## 1. Comparison of the fPS-phage genomes

The nucleotide sequences of the 16 phage genomes show a high level of sequence similarity (between 90–97%) (Figure S1, Table S1). Overview of the fPS-genomes is shown in Figure S1 below and detailed description of the differences in Figure S2. As a representative of the fPS-phages, the genomic map of phage fPS-7 is shown.

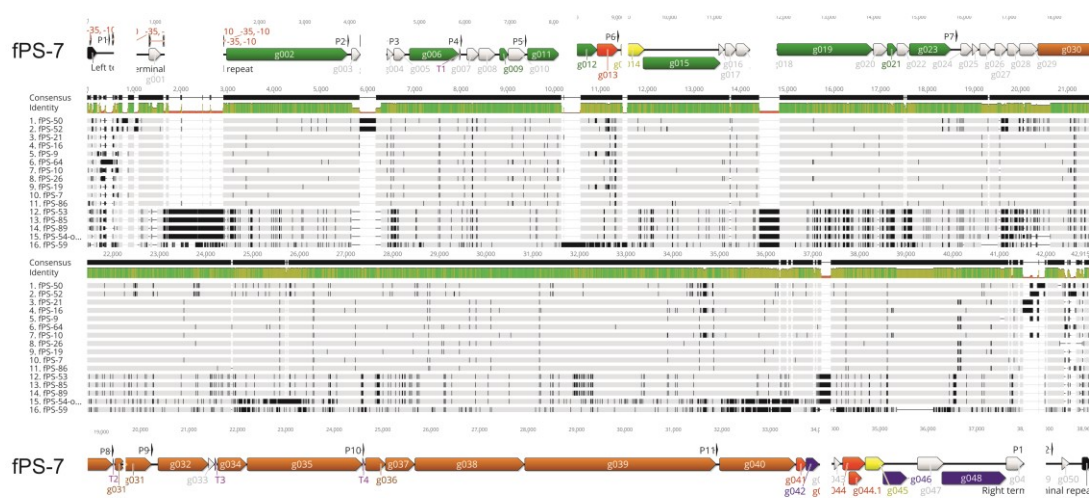

**Figure S1.** Overview of the alignment of the fPS-genomes. The genomes were aligned using the MAFFT program and the clustal alignment was imported to Geneious. The genomes are represented by grey bars within which the differences from the consensus sequence are indicated by black vertical lines. The consensus sequence and identity graph are given below the scale line. The genetic map of the genome of fPS-7 is shown aligned to the multiple alignment to indicate the genes located in the conserved regions.

A. Clustal W multiple sequence alignment of tailfiber sequences of fPS-7 and related podoviruses

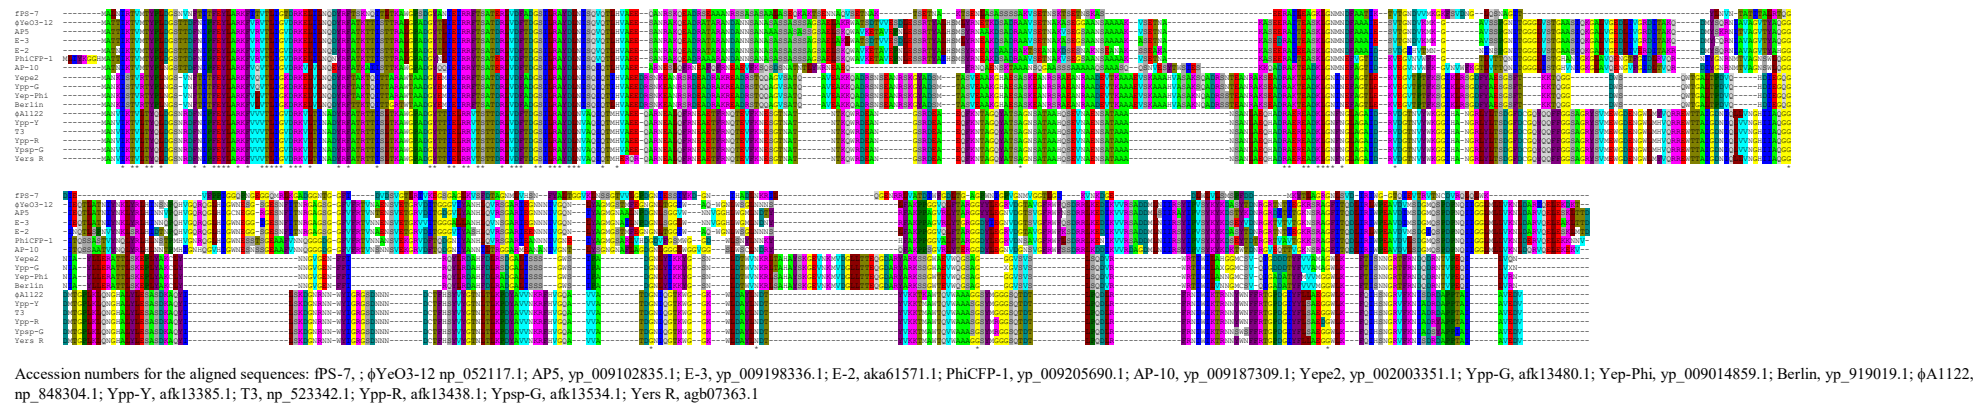

B. Clustal W multiple sequence alignment of tailfiber sequences of fPS-phages

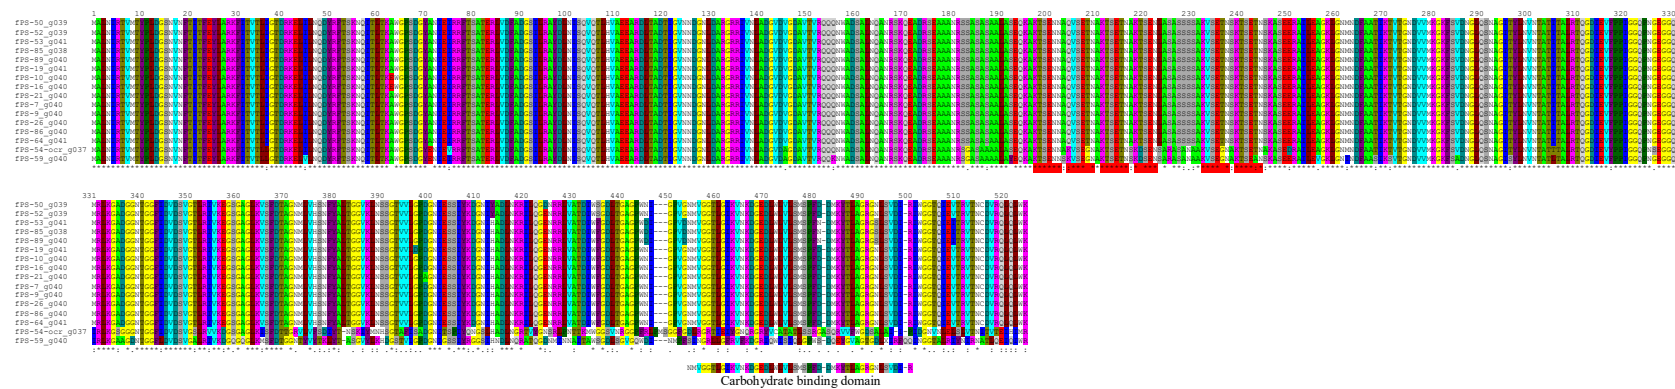

Figure S2: Multiple alignments of the phage tail fiber sequences.

## 2. Microevolution details of the fPS-phages

The sequence alignment revealed interesting differences between the nucleotide sequences of the fPS-phages. These are illustrated in more details in Figure S2. To help to find the locations in Figure S2 discussed below we have used boxes where the relevant alignments are framed and labelled as boxes 1–22. These are summarized in the main text, section 3.2.5 (Table 4).

The genomes showed great variability close to the TRs. For example, there are different numbers of repeats present in both TRs, those of left TR are indicated in **Boxes 1 and 2** (Figure S2). The Group III phage fPS-59 carries a putative gene (*g001*) that starts at the end of left TR; this gene is absent from all other phages. Flanking the the left TR, before phage promoter P1, different numbers of two repeat variations of 10 or 11 bp are present ranging in total between 11 and 34 repeats (Table S19, Figure S2, **Box 3**). While the phage promoter P1 region is highly conserved in all phages, the Group Ib phages carry on both flanking regions 1–5 repeats of 28 and 23 bp, respectively (**Boxes 4 and 5**).

The predicted gene *g001* of Group I differs from that of groups II and III. The latter two miss the 5'-region of *g001* present in Group I phages and the 3'-ends also differ (**Box 6**). Thereafter, the Group II phages carry an extra gene (annotated as *g002* in them) that is absent from Group I and III phages. The gene encodes for a predicted protein kinase. The Group I *g002*, and Group II and III *g003*, encode for phage RNAP. While the latter gene is overall highly identical; the first 5'-end 150 bp of Group II gene present differences when compared to Group I and III (Figure S2).

Immediately after the RNAP encoding gene *g002*, Groups Ia and Ib have *g003* that is longer in Group Ib due to an insertion of 342 bp fragment in fPS-50 and fPS-52 genomes (**Box 7**). That causes a frame shift and generates into Group Ib *g004* that shares most of its sequence with the 3'-end of Group Ia *g003*. The Group Ia *g003* sequence is absent from groups II and III phages. The *g004*–*g011* block of genes is conserved in all fPS-phages. Thereafter only the sequence of fPS-59 differs from those of Group I and II sequences in such that it has insertions between the Group I genes *g011* and *g012* (**Box 8**) and between *g013* and *g014* (**Box 9**). The first insertion in fPS-59 contains the predicted gene *g012* that ends overlapping with a few codons the following endonuclease coding gene that differs from the Group I and II gene showing 72% nucleotide and 76% amino acid sequence identity. Most differences were located in the 5'-end of the endonuclease coding gene. The second insertion in fPS-59 is 94 bp long and may encode a 30 amino acid long polypeptide (**Box 9**).

Thereafter the genomes are almost identical over the genes *g014*–*g018*. Between genes *g016* and *g017* apparently forming part of ribosomal binding site (TAAGG) is a poly-G stretch that varies between the Group I phages from G7–G13 (**Box 10**). In Group II and III phages it is replaced by GGAG.

Sharply before the RBS of the DNA polymerase encoding gene (*g019*), Group II and III phages have a 422 bp insertion (**Box 11**) that contains an extra gene (Group II *g019* and fPS-59 *g020*). The *g019*–*g024* genes are conserved in all phages except for the *g022* that in Group II phages has different 5'-end resulting in different N-terminal sequence of 15 amino acids (**Box 12**). The Group I genes *g025* and *g026* are missing from fPS-59.

An ORF corresponding to Group Ia gene *g027* is present in Groups Ib, II and III but has lost its start codon forming a pseudogene. The start codon in *g027* is UUG preceded by a perfect RBS (TAAGGAGG) that is conserved in all phages, however, on both sides of the RBS the Group Ia sequence differs from that of Group Ib, II and III sequences over a stretch of 116 bp. This has generated the pseudogene in the Groups Ib, II and III (**Box 13**). The next variation is found within the Group Ia gene *g028*: in the corresponding gene of groups Ib, II and III there are 6 or 21 bp deletions and short duplications within a 40 bp GC-rich stretch (**Box 14**).

The Group I gene *g029* is missing from both fPS-54-ocr and fPS-59, and from the sequence data it looks like that the Group I gene *g029* has been inserted into this locus and has replaced the RBS and its immediate upstream AT-rich sequence present in fPS-54-ocr and fPS-59 (**Boxes 15 and 16**).

All the phage genomes carry almost identical genes corresponding to Group I genes from *g030* to 5'-terminus of *g035*. These genes encode for structural proteins. Between *g033* and *g034* RBS is a poly-T stretch ranging from T<sub>7</sub> to T<sub>9</sub> that is part of the Rho-independent terminator (**Box 17**). The *g035*

is predicted to encode for tail tubular protein B. The corresponding gene of fPS-54-ocr and fPS-59 differs from that of the others with ca 90% identity to them.

Genes *g036–g039* encoding for structural proteins are conserved in all phages. Also the 5′-third of *g040* encoding the receptor binding tail fiber protein is conserved, however, the 3′-thirds of the genes in fPS-54-ocr and fPS-59 are highly divergent to the others and also to each other, reflecting their different host ranges (**Box 18**).

All the phage genomes carry almost identical genes corresponding to Group I genes *g041–g050* with some exceptions. The Group I phages differ from Group II and III phages at *g043*. While fPS-59 lacks the gene; the Group II phages have an insertion within the *g043* and this causes that the Group I and II genes have different 3′-ends (**Box 19**). The *g047* is missing from fPS-59 due to a sharp deletion: the sequences on both sides of the deletion are almost 100% identical. In fPS-9, a deletion of 86 bp causes truncation of the Group I *g049* gene, while in Group II phages there is a 23 bp duplication that alters the frame in the 3′-end of the gene thereby altering the last eight codons (**Box 20**). Downstream of phage promoter P12, an 80 bp repeat was present in 3–5 copies in fPS-50, fPS-52, fPS-21, and fPS-16, while in all other phages it was present as one copy (**Box 21**).

Analogous to the region flanking left TR, also the region upstream the right TR the phages varied and contained variable numbers of five different repeat sequences of 10–22 bp in size (Table S20, Figure S2, **Box 22**).

**Figure S3.** The MAFFT generated multiple alignment of fPS-phage genome sequences from Figure S1 at nucleotide sequence level. The bases are highlighted in different colors to facilitate comparison. On top of the alignments are indicated the locations of the terminal repeats, -35 and -10 boxes of host RNAP-specific promoters, the phage RNAP-specific promoters (P1 – P12) and genes. The boxes 1 – 22 locate the differences discussed in the text.



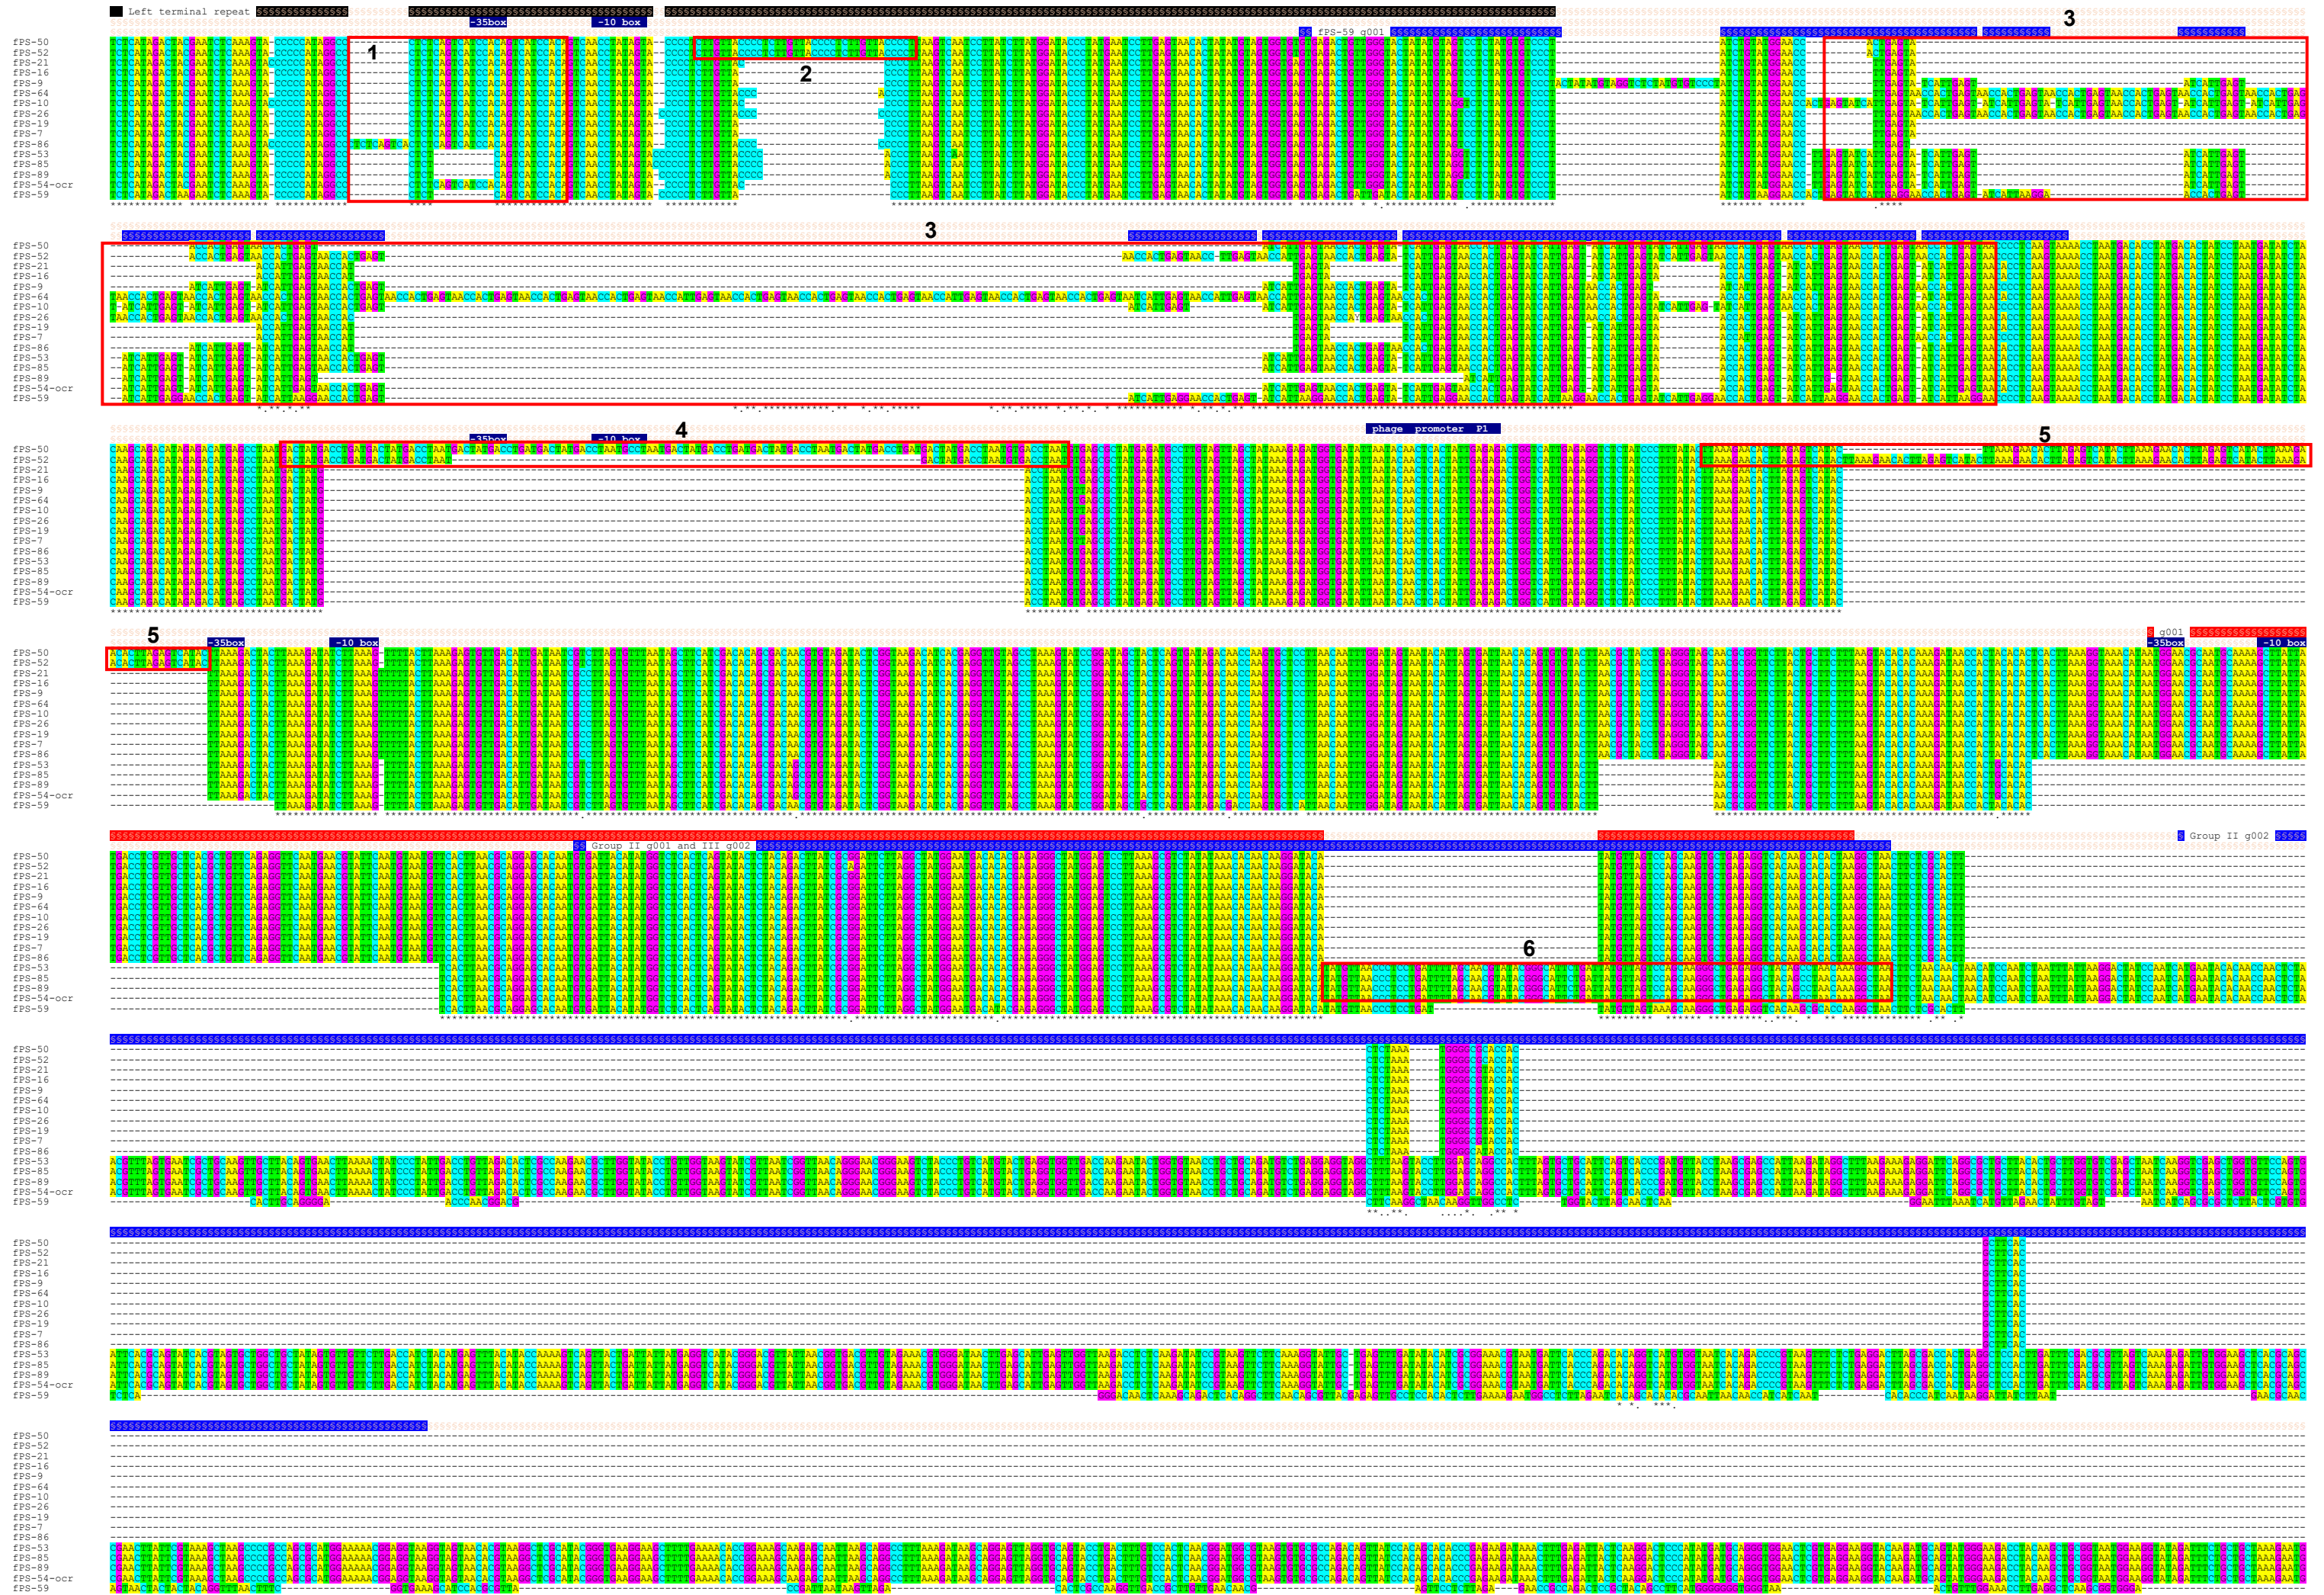

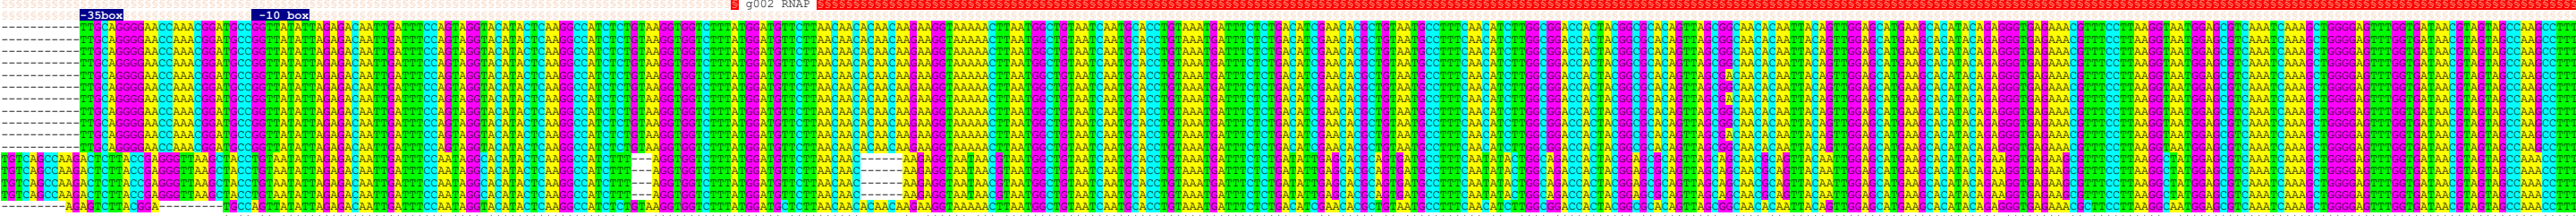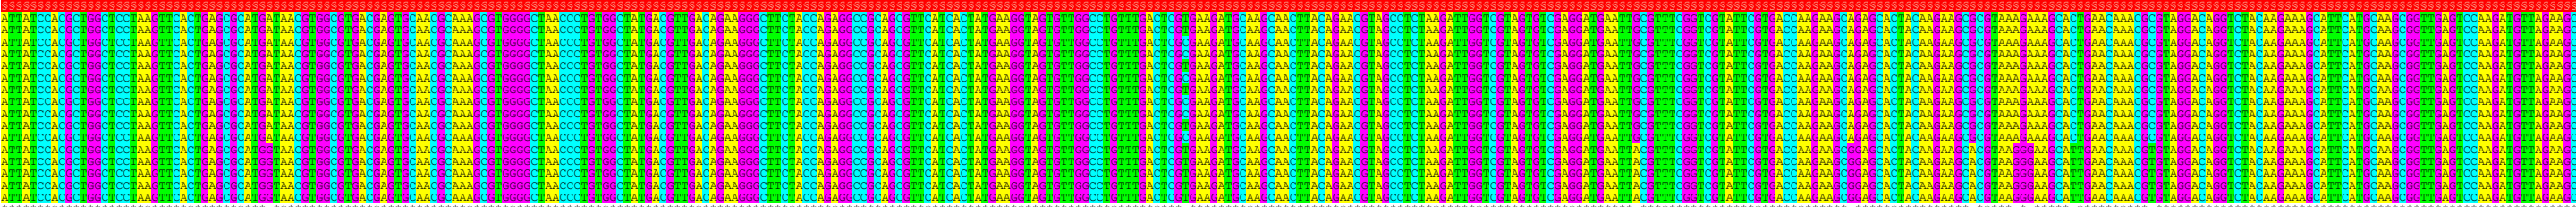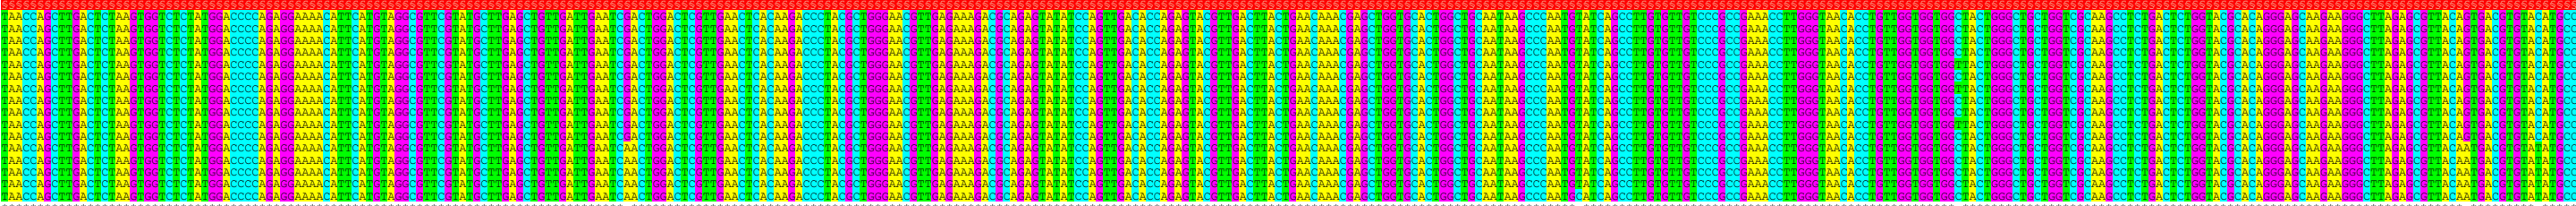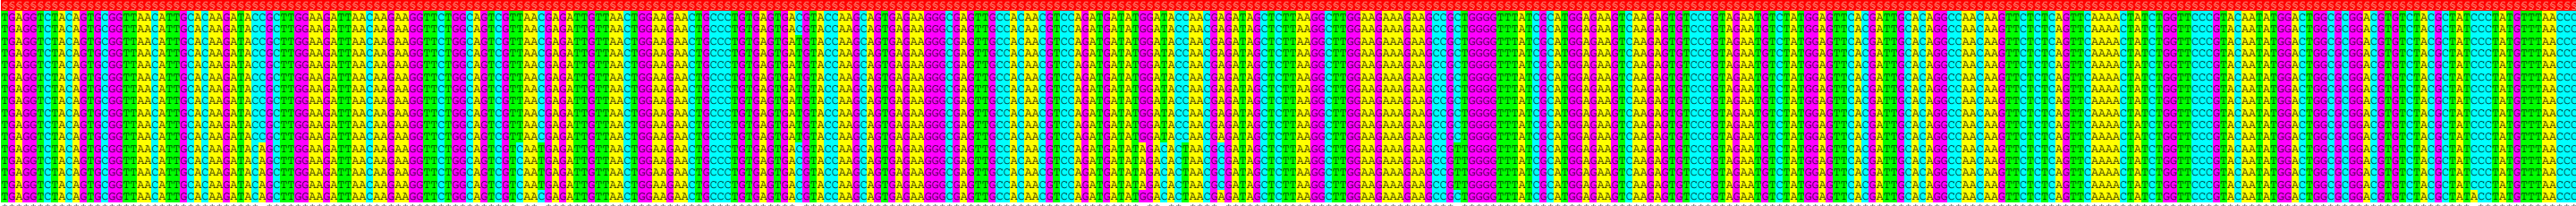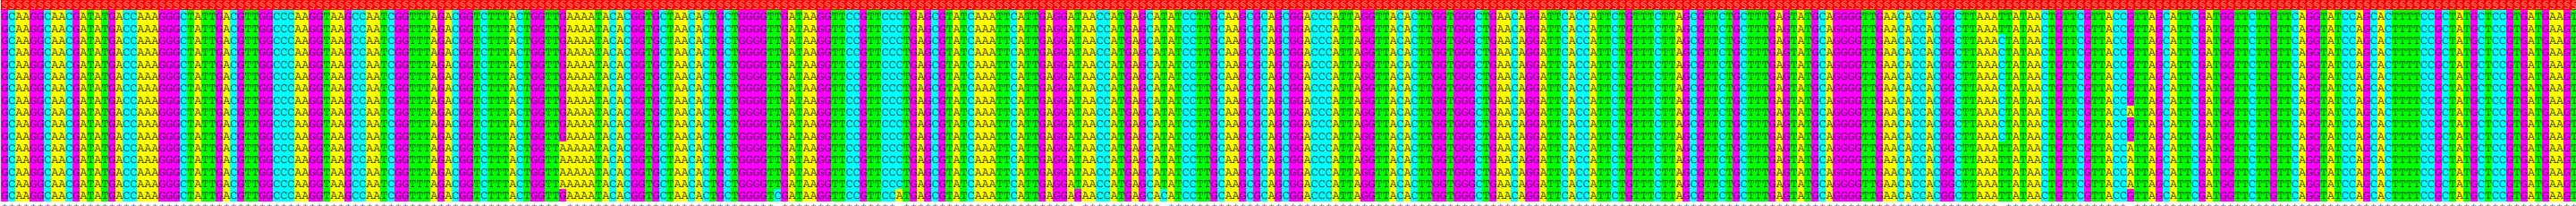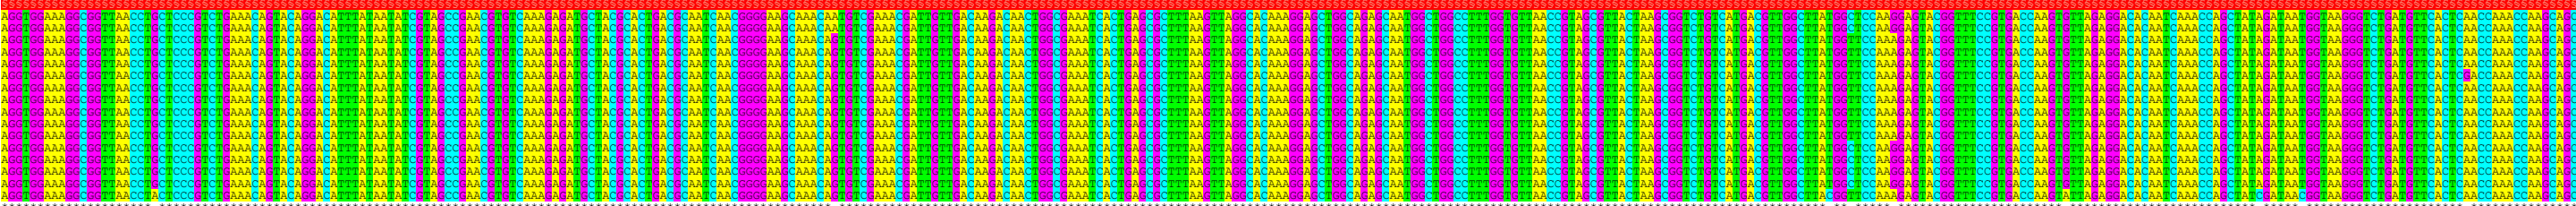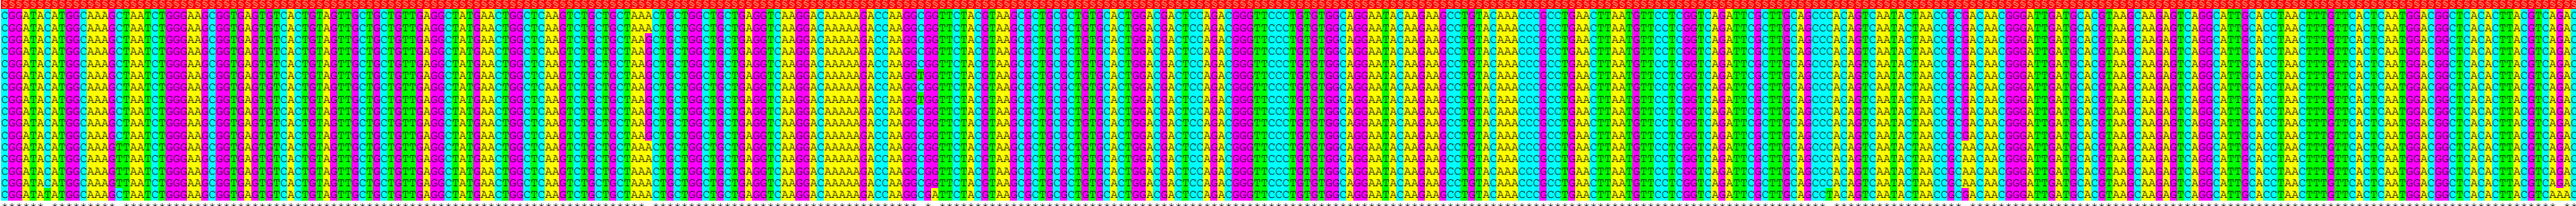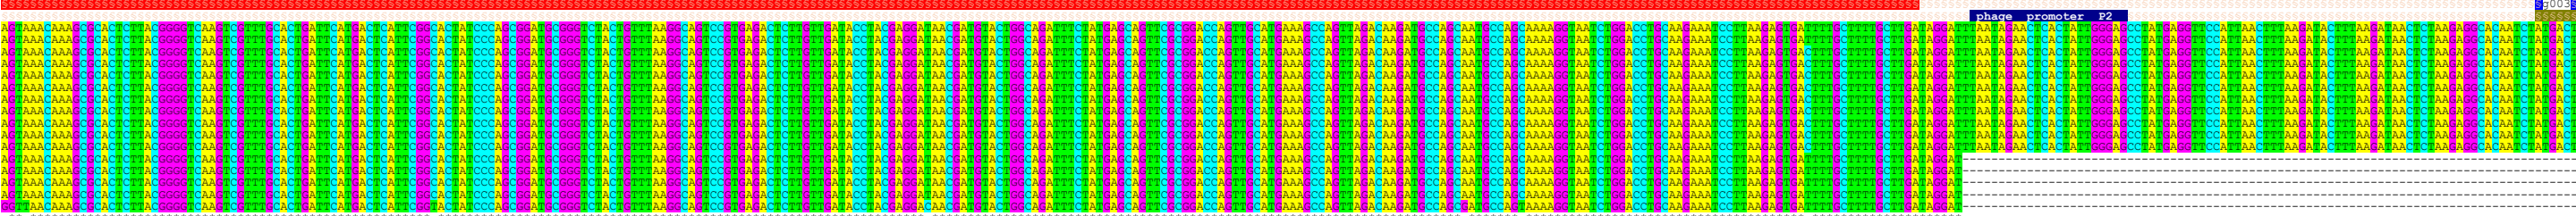

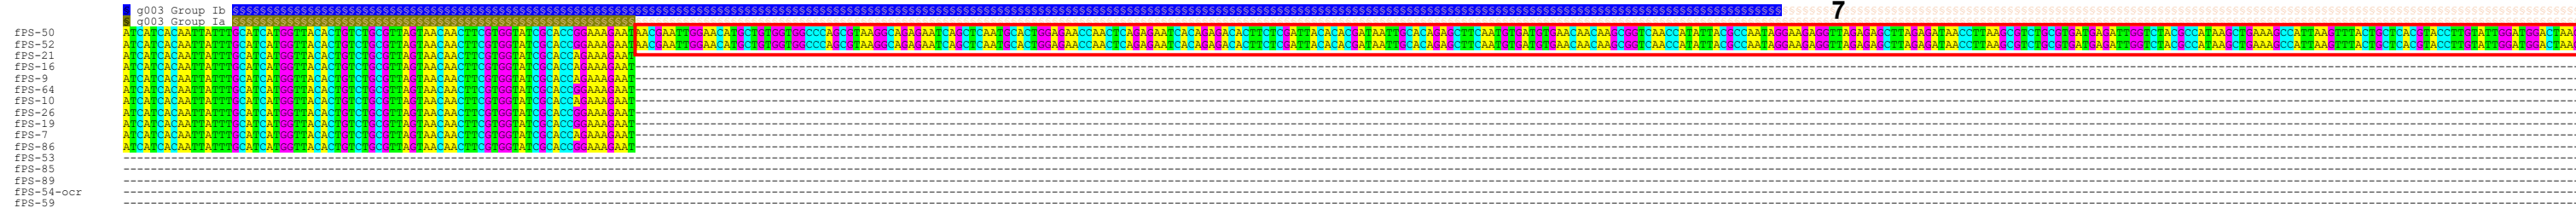

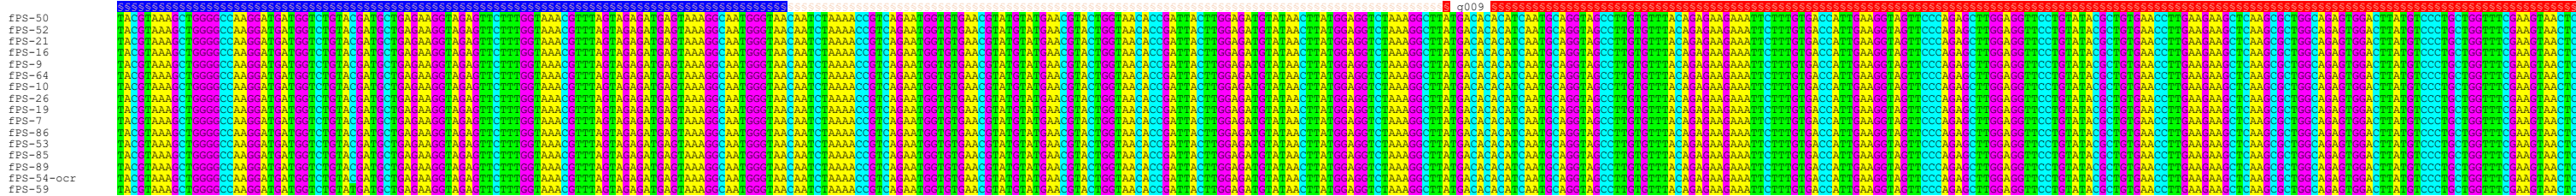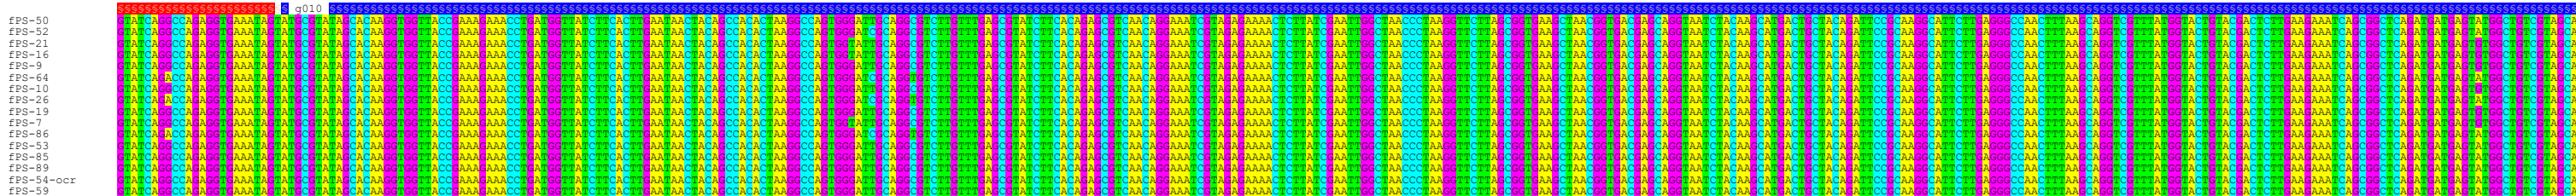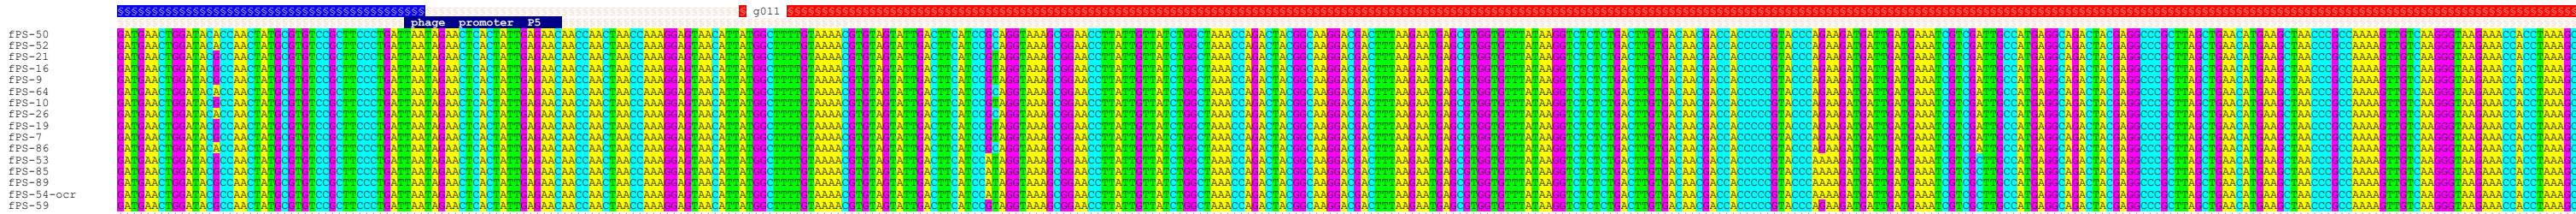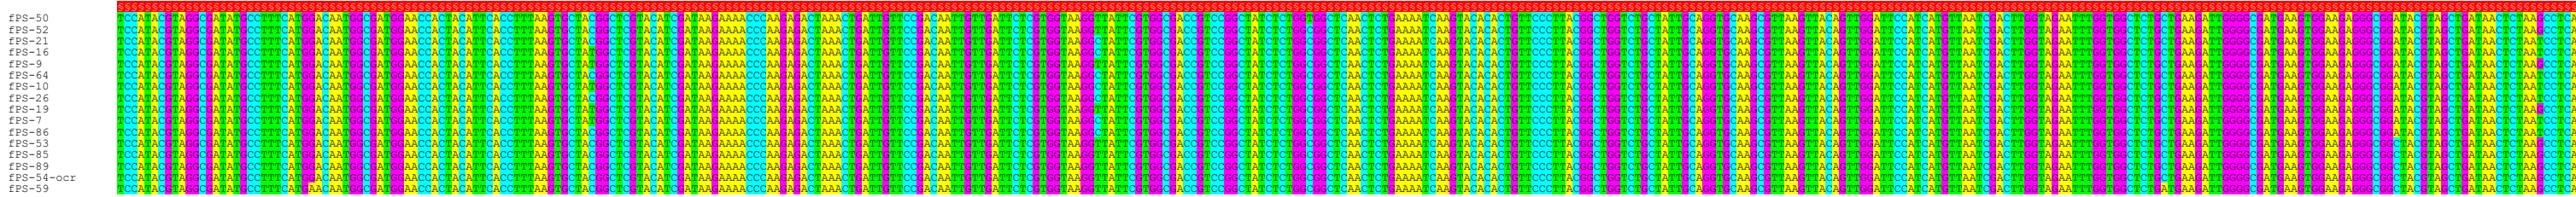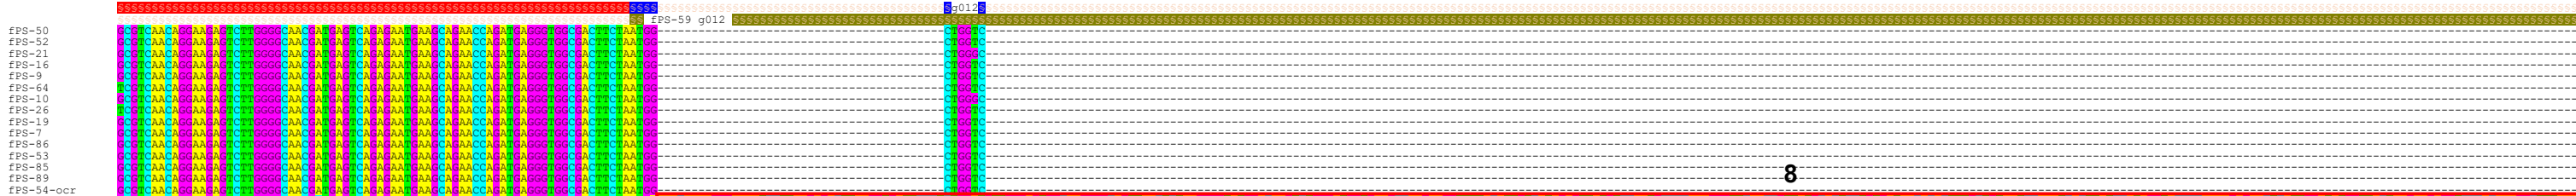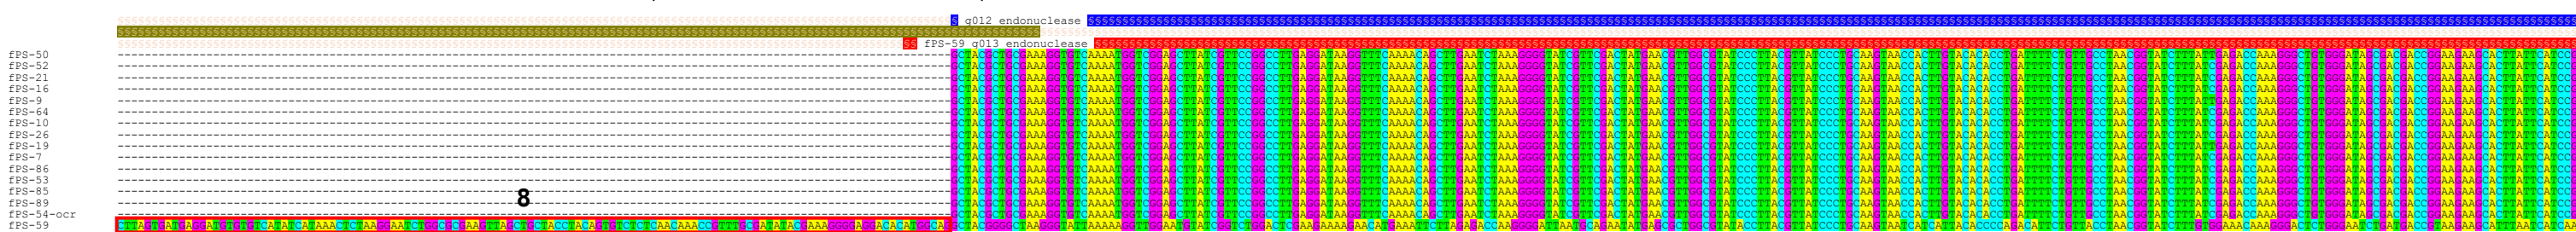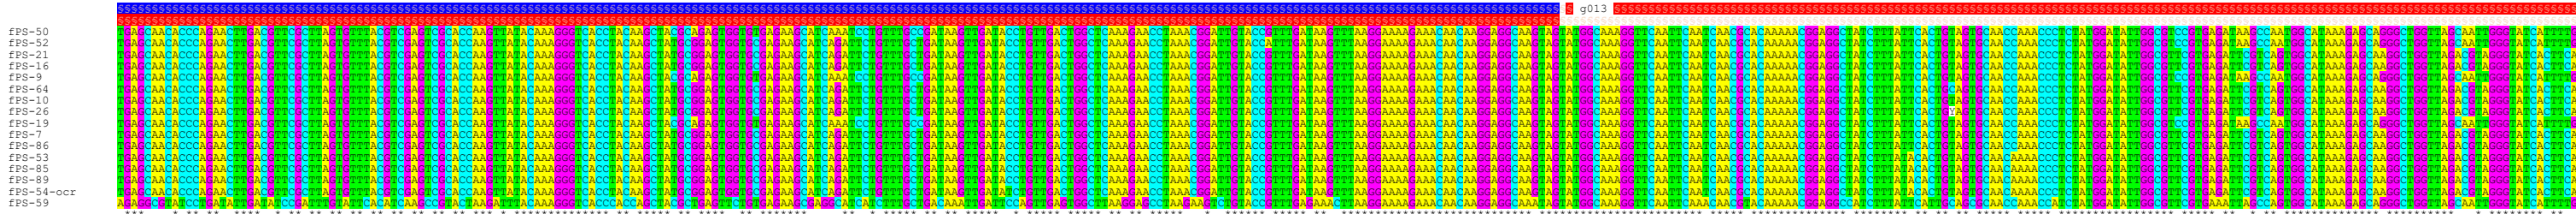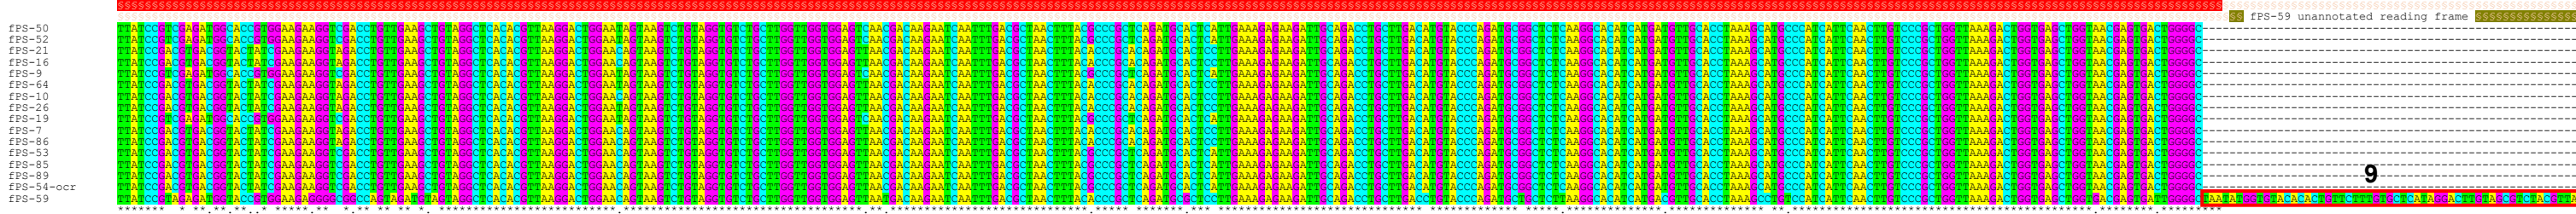







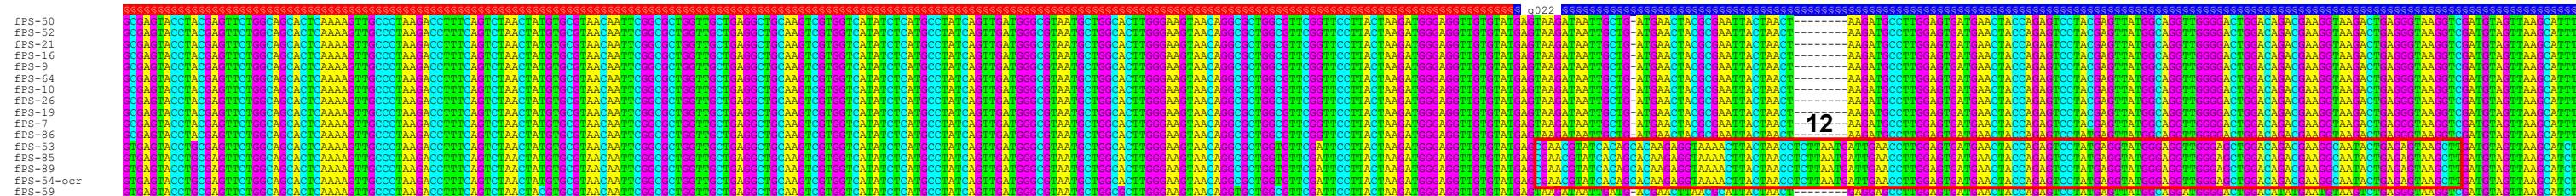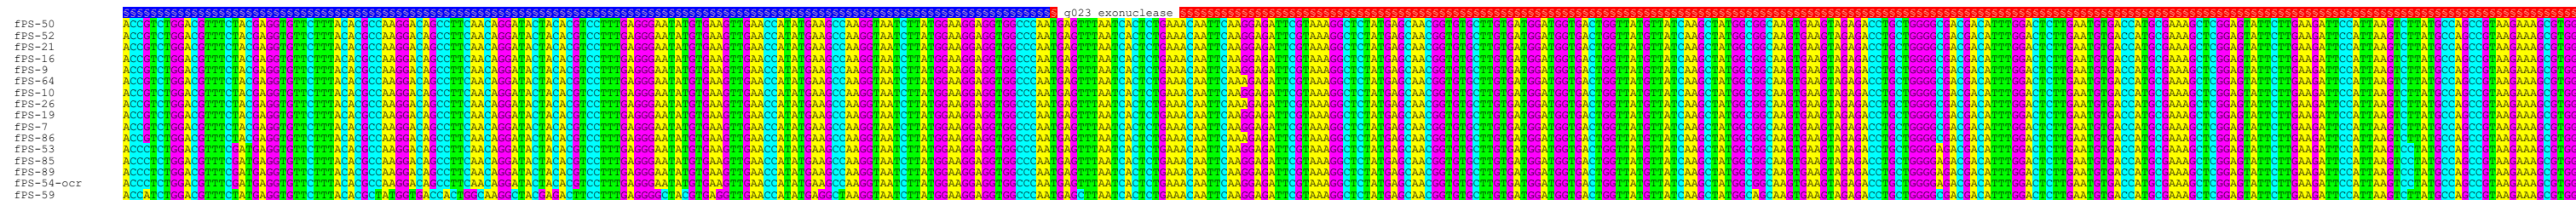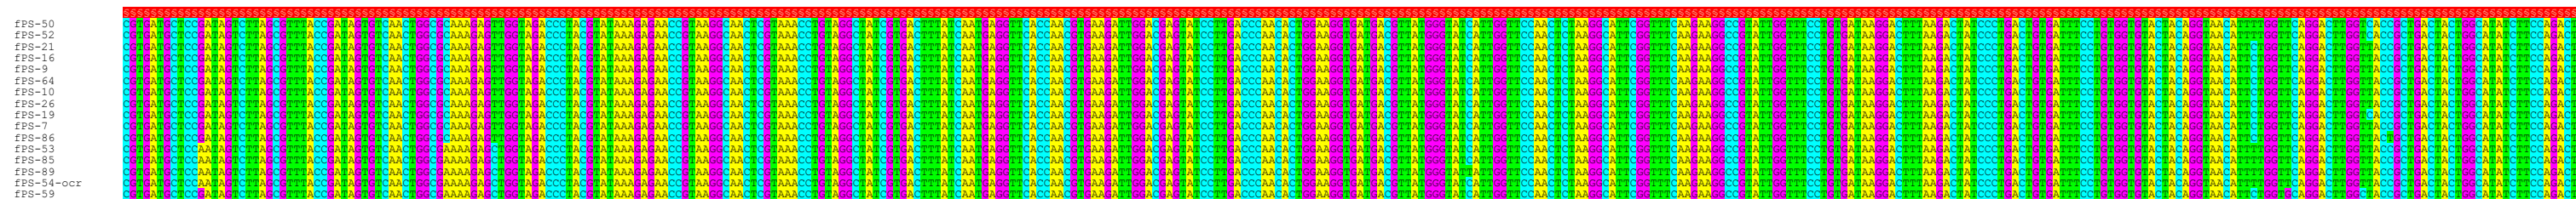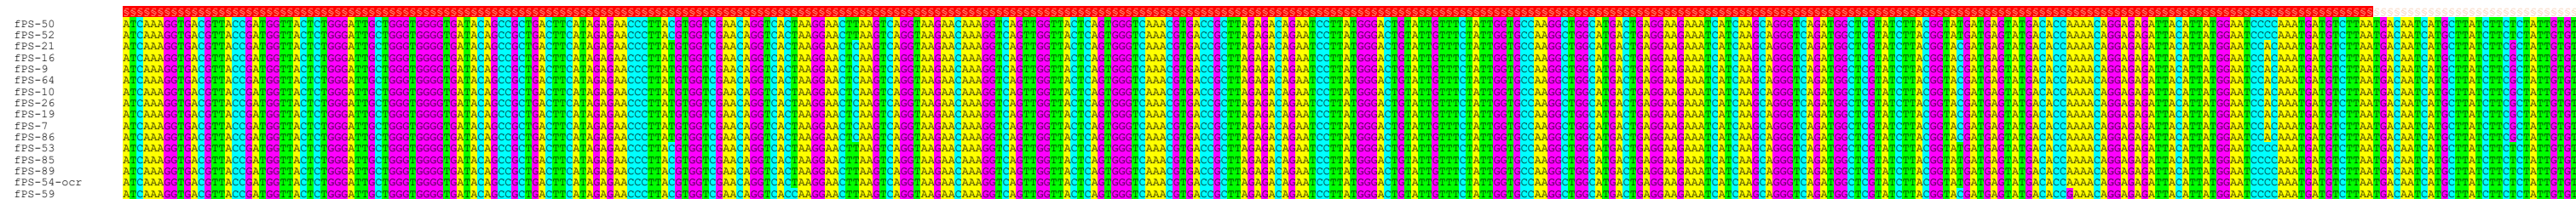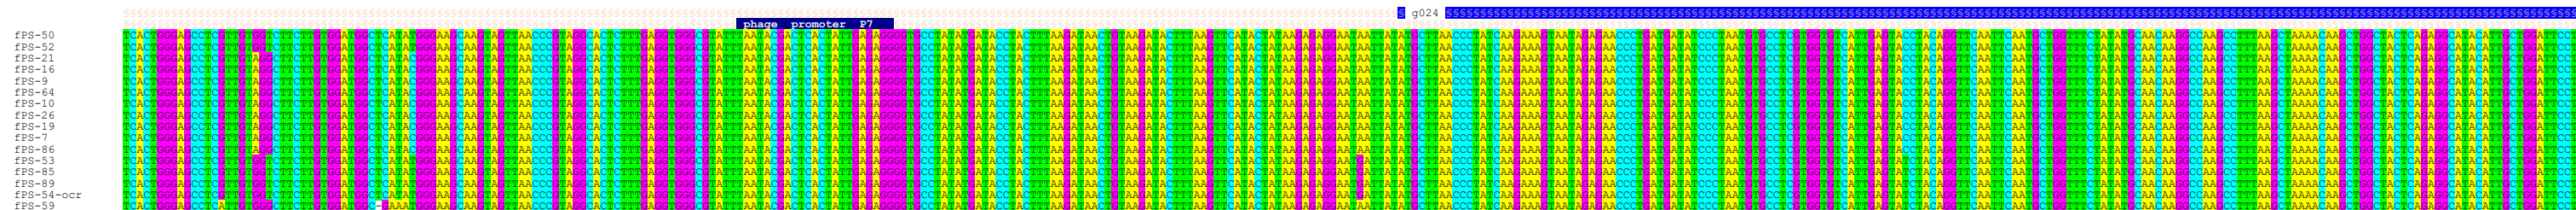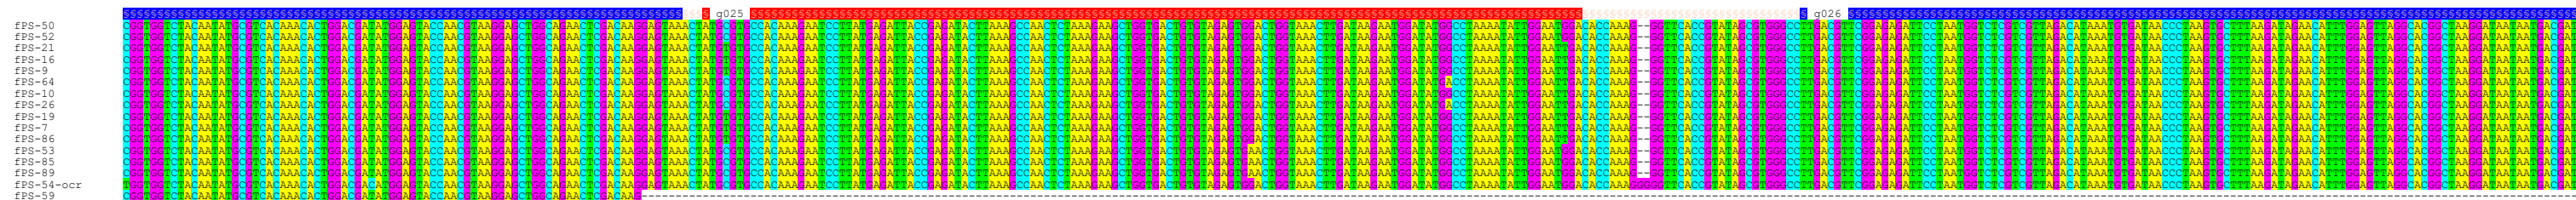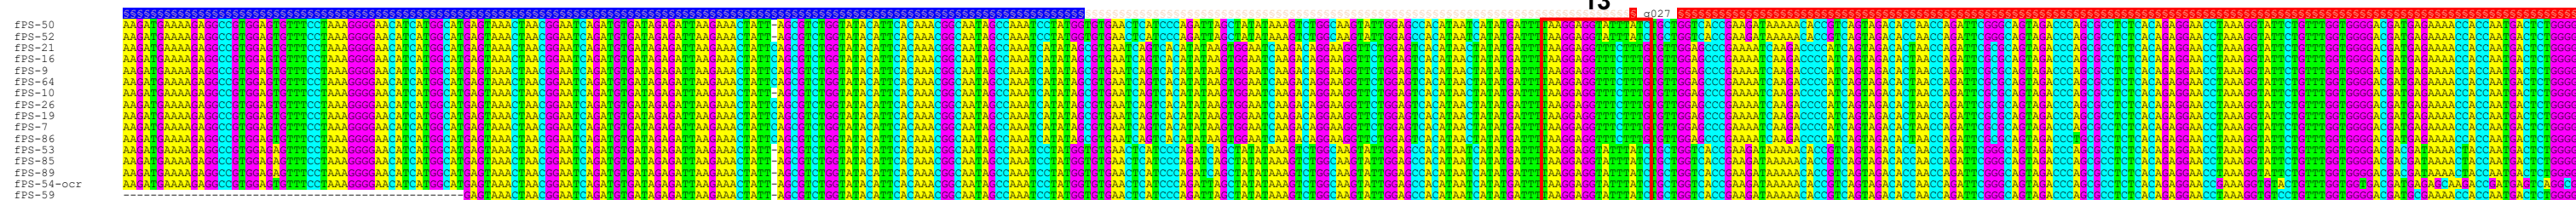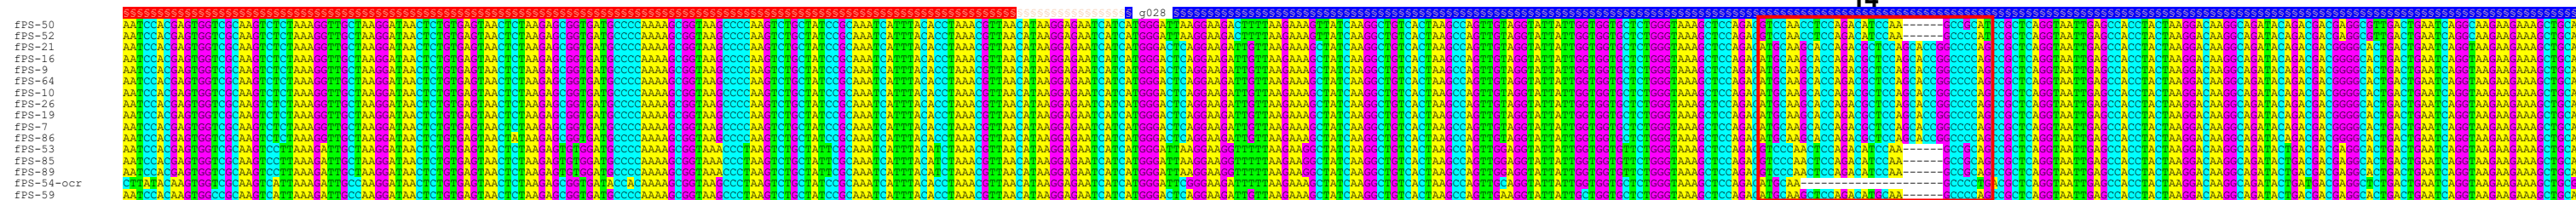



15

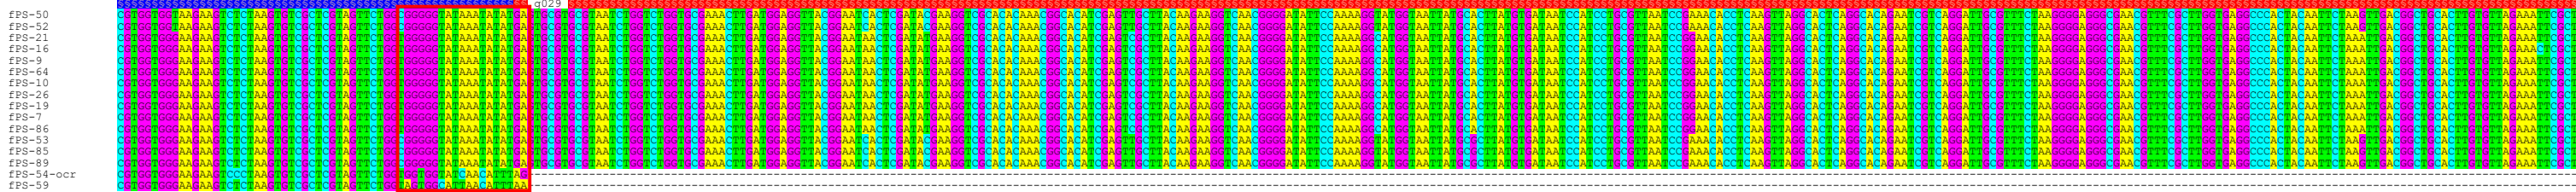

16

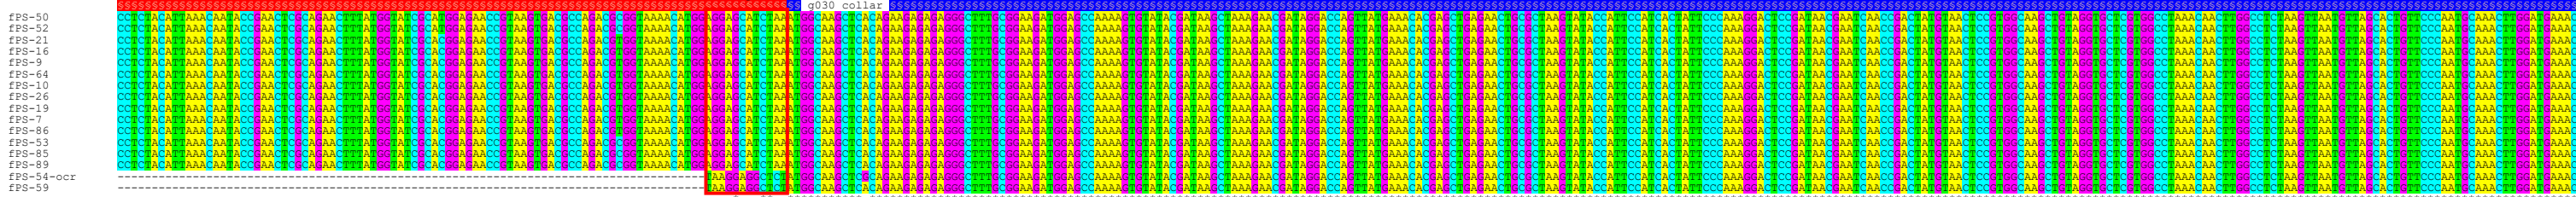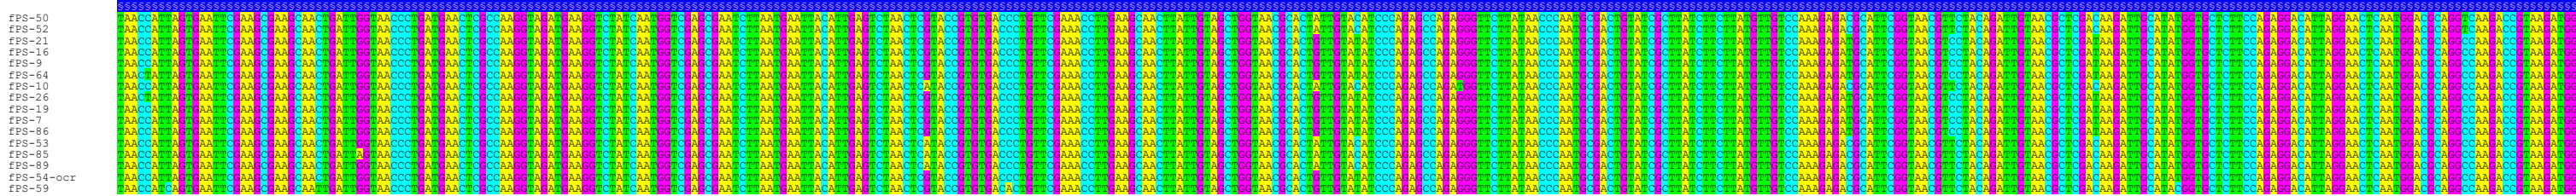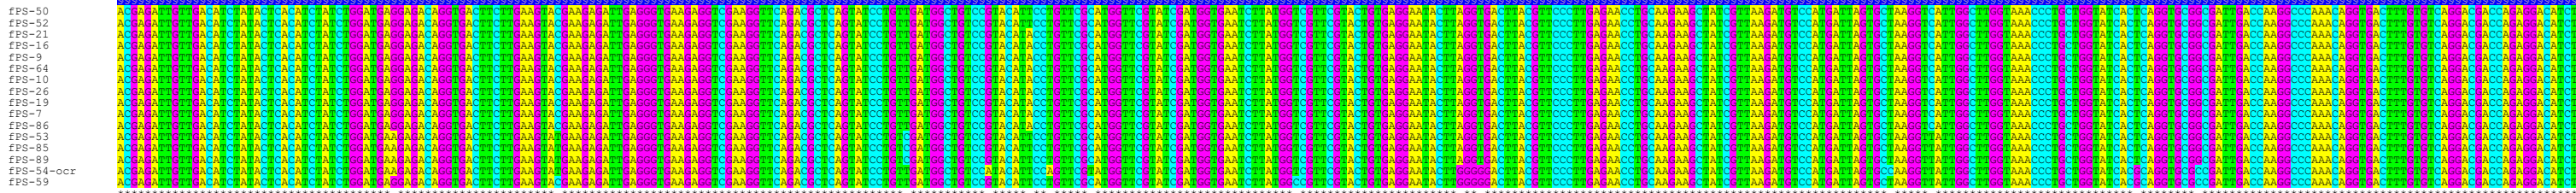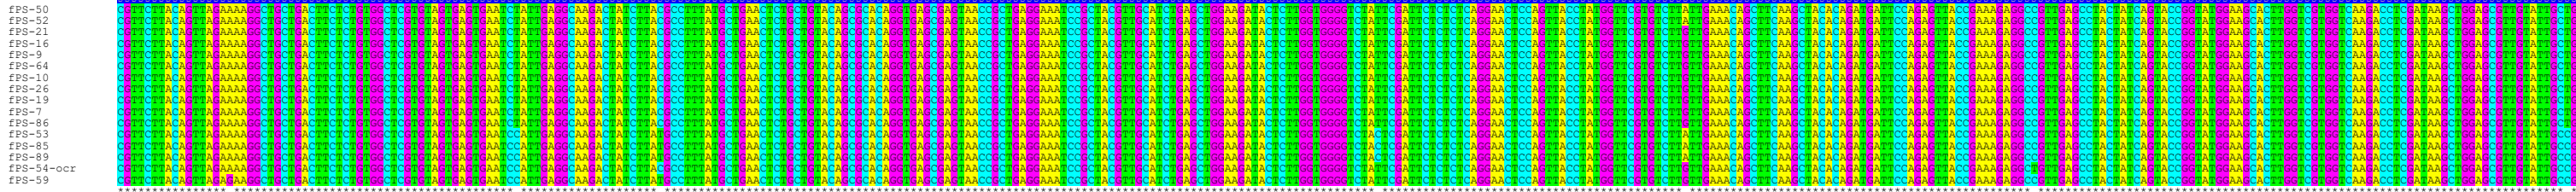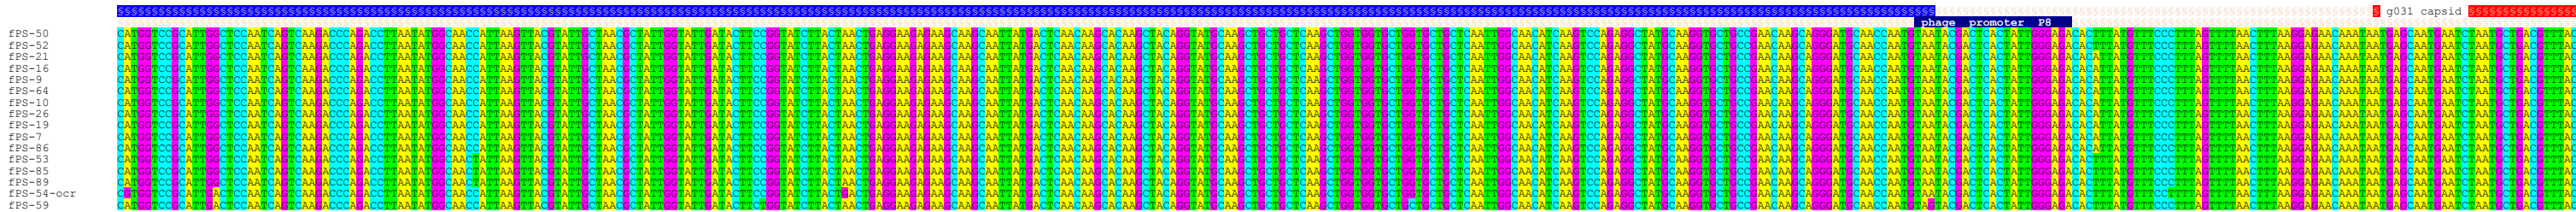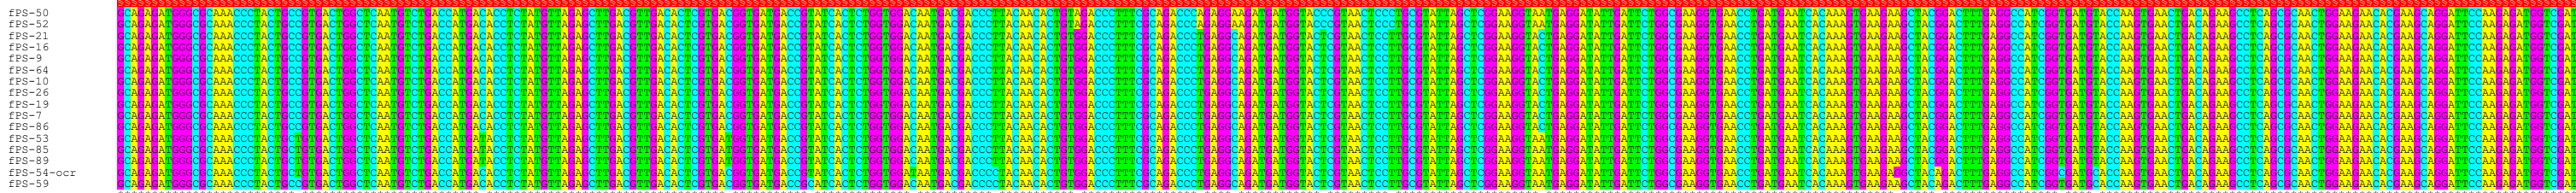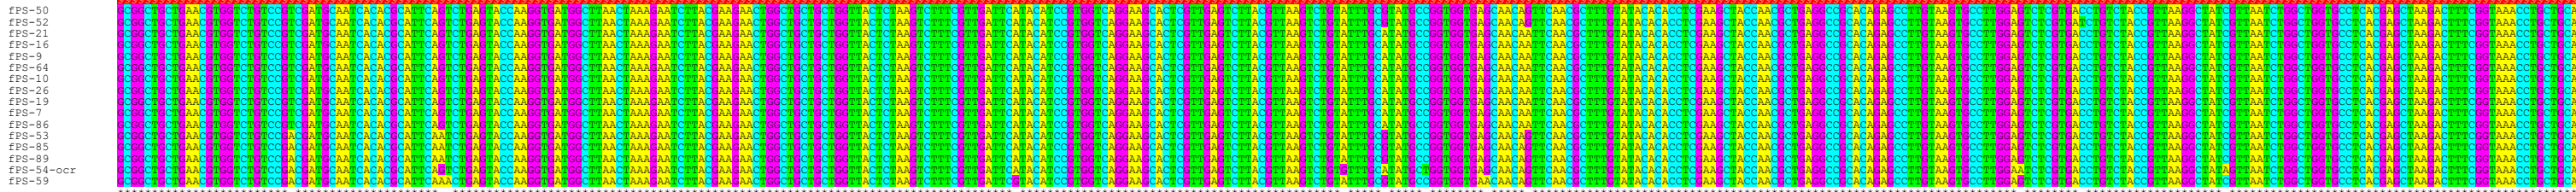

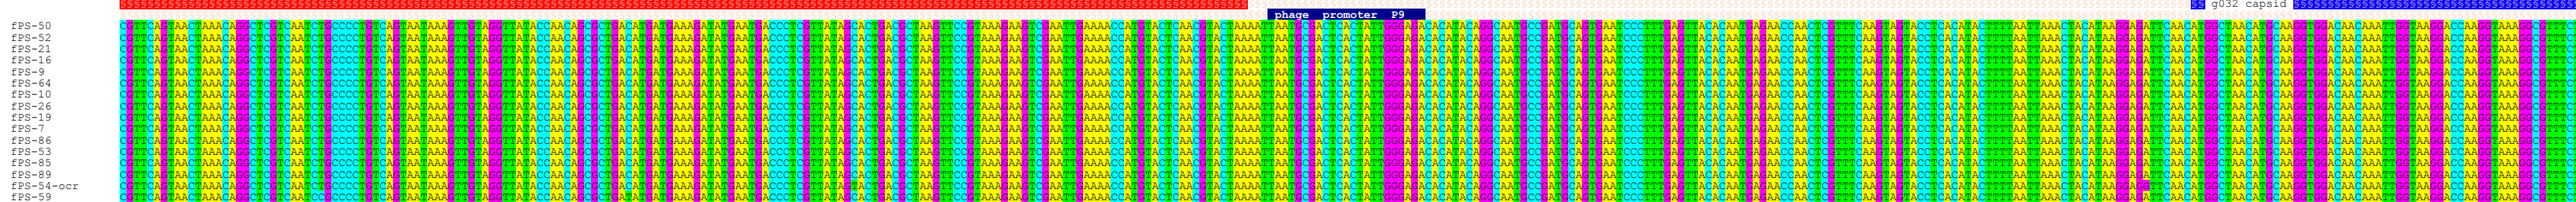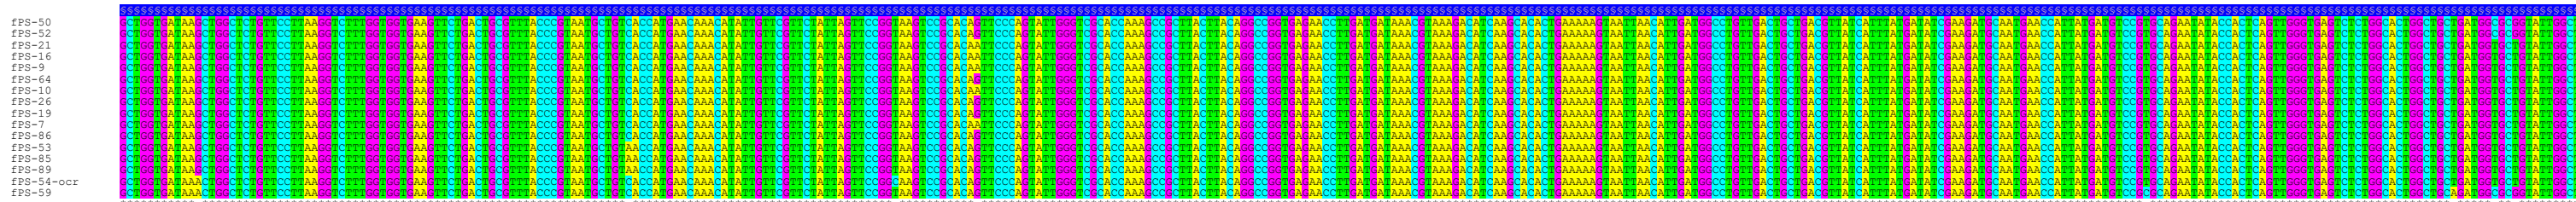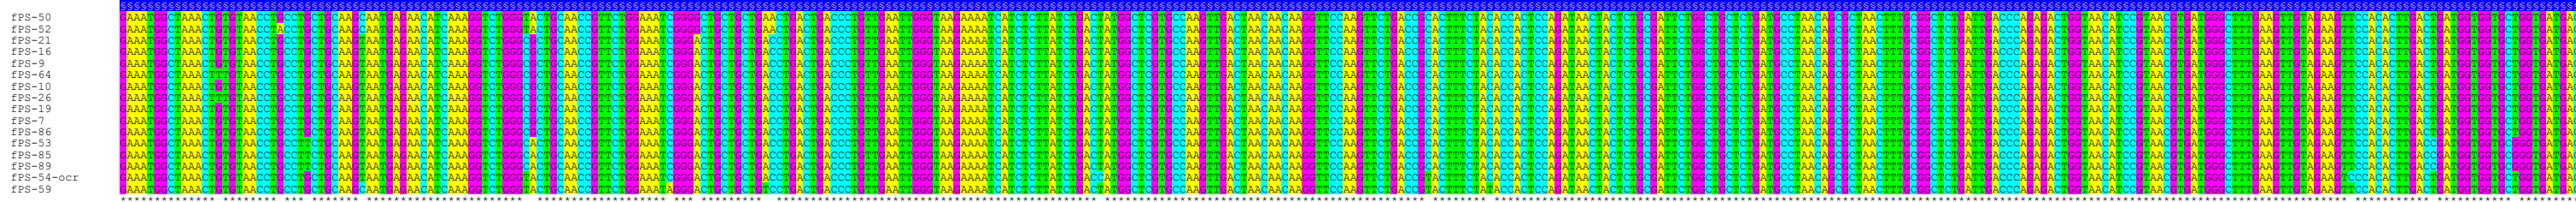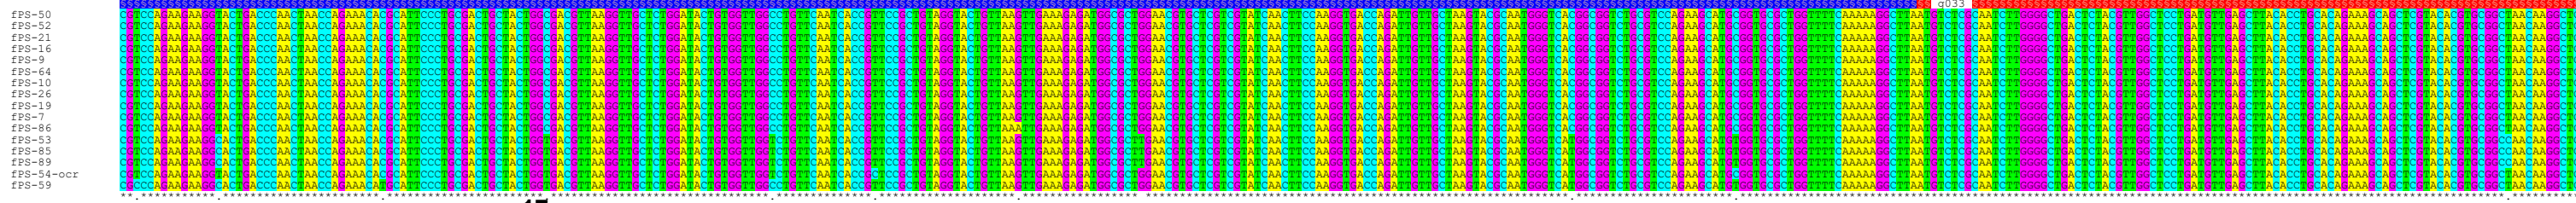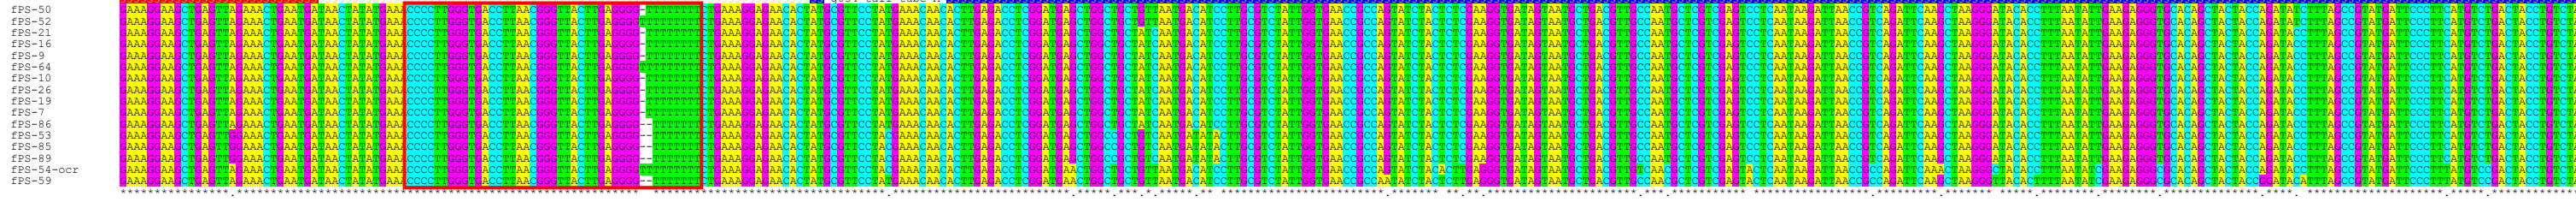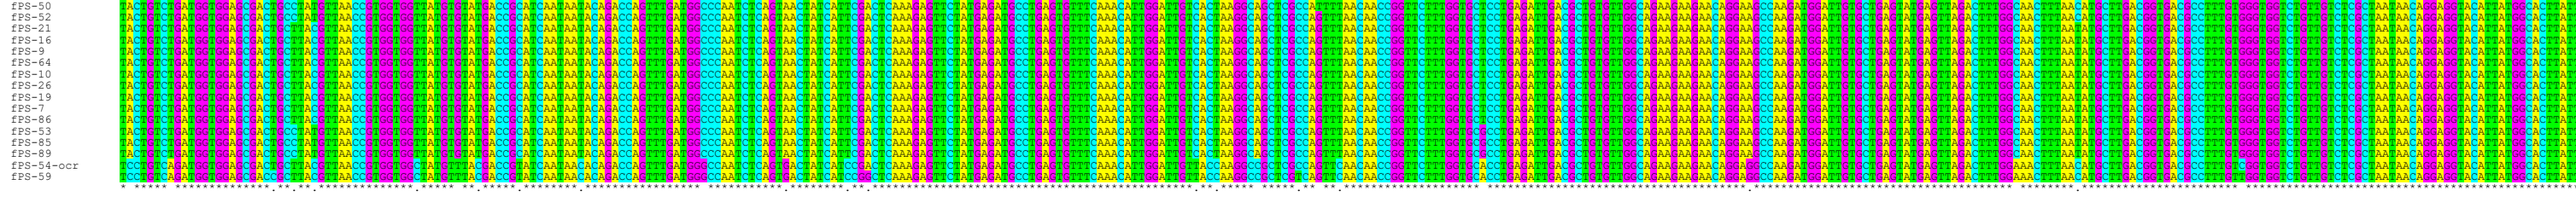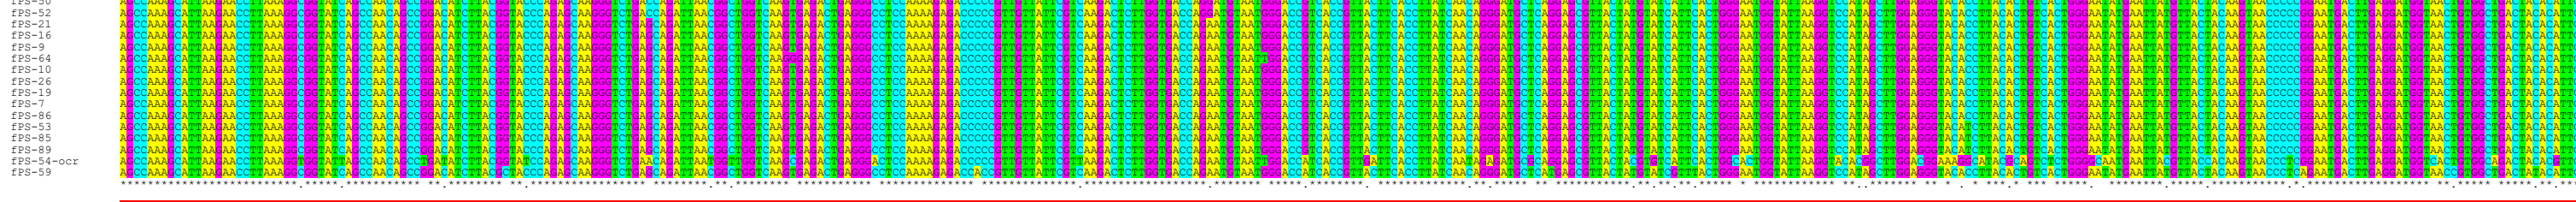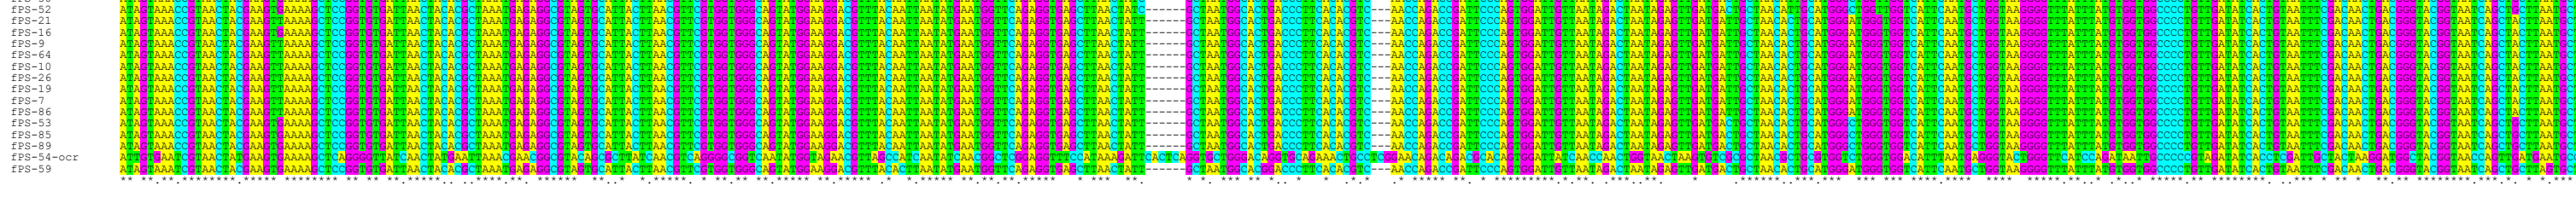

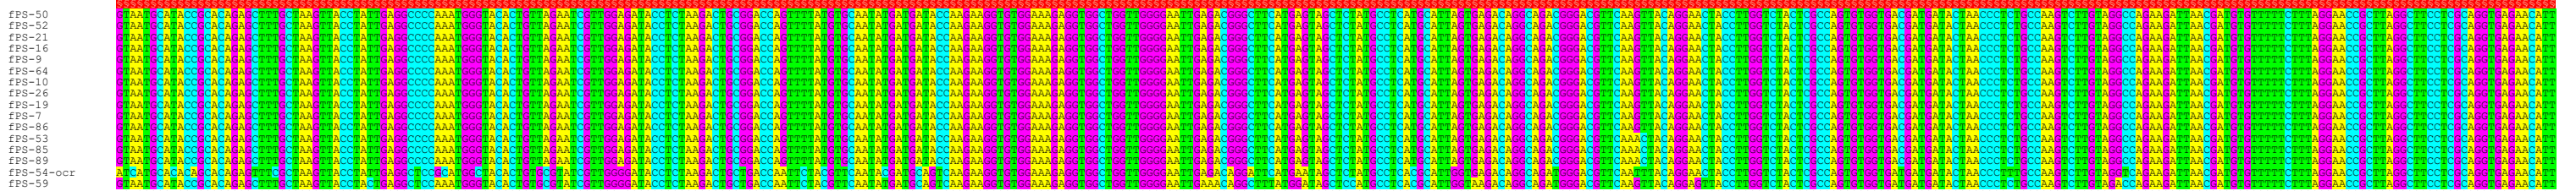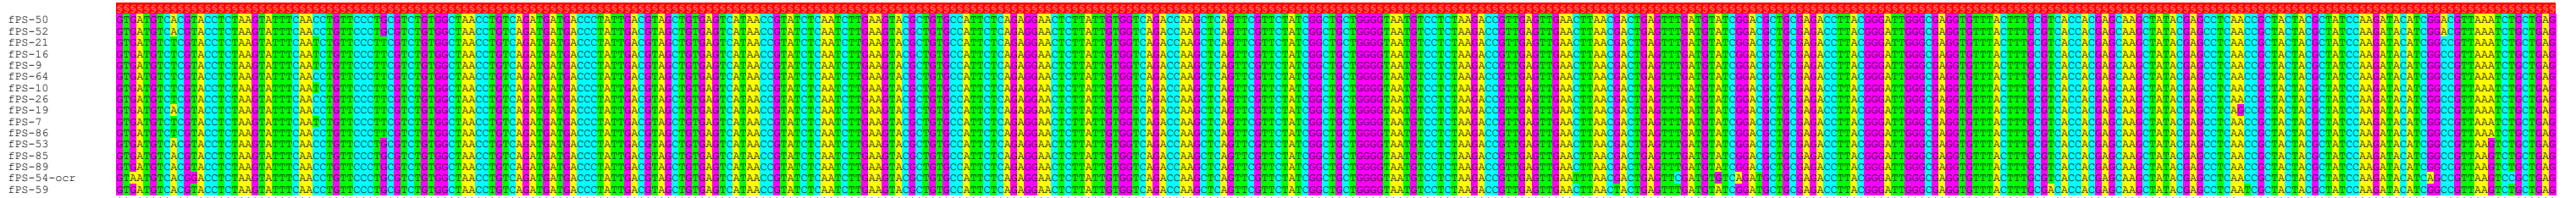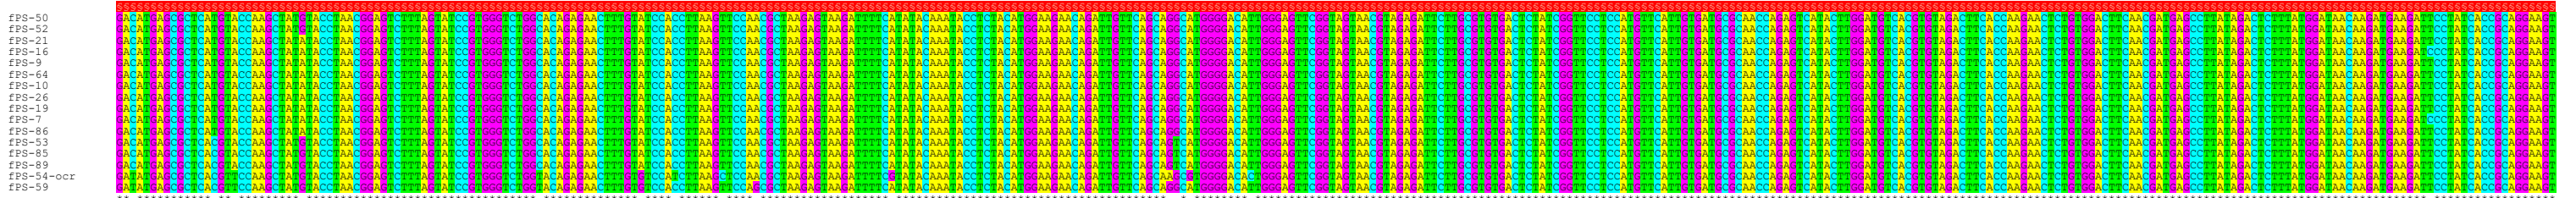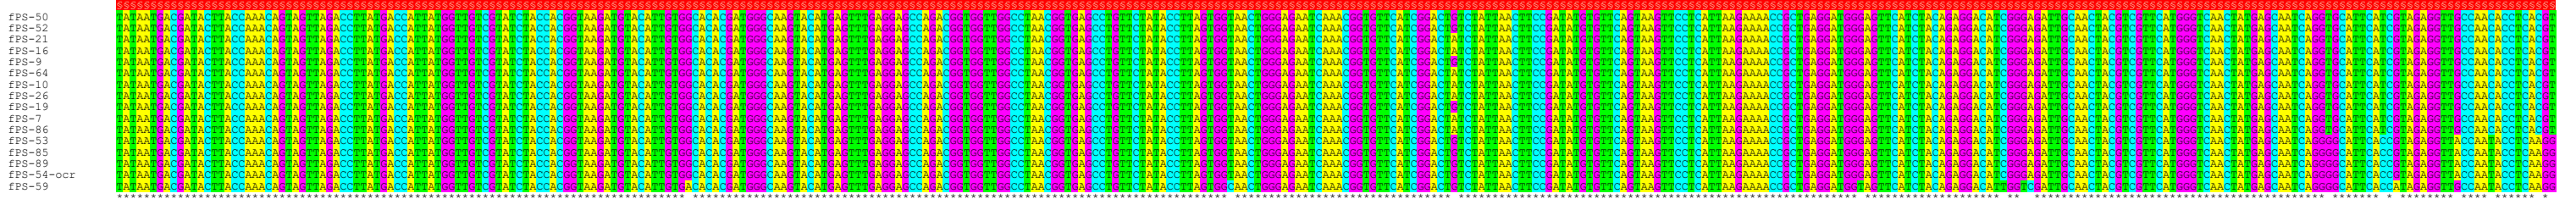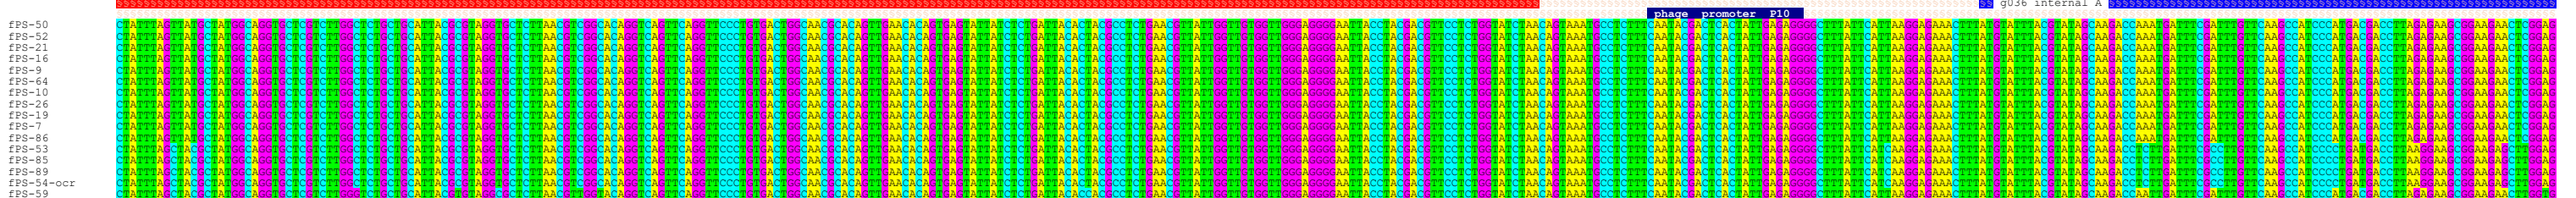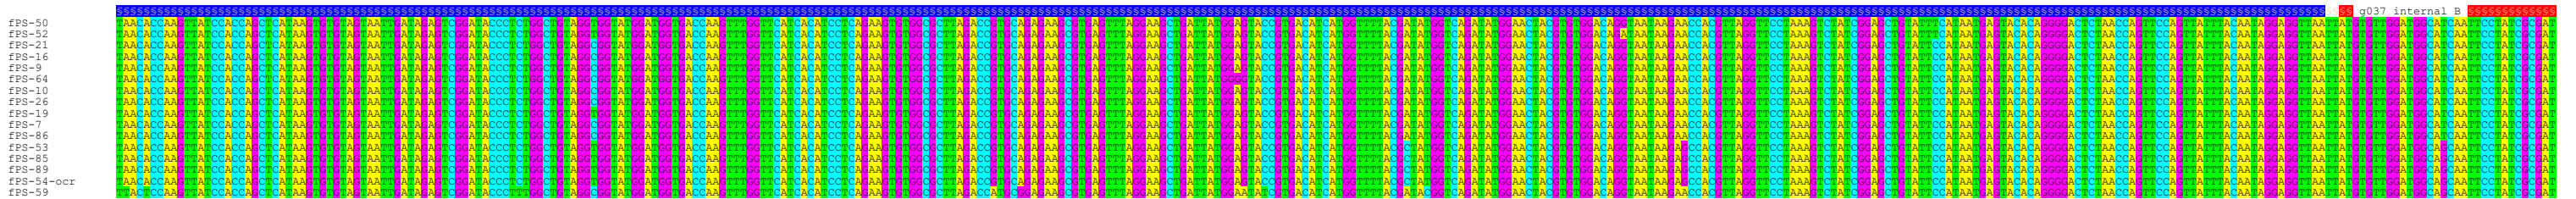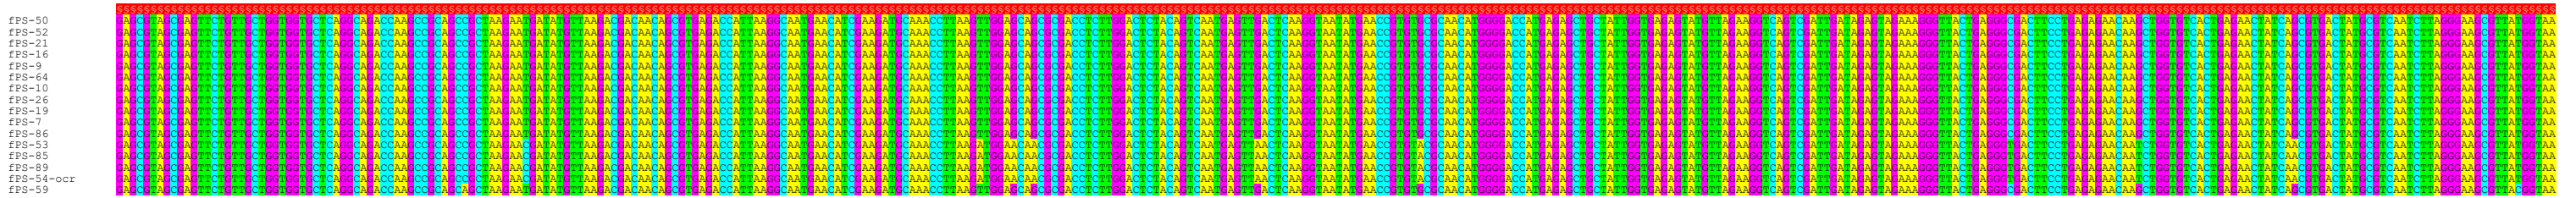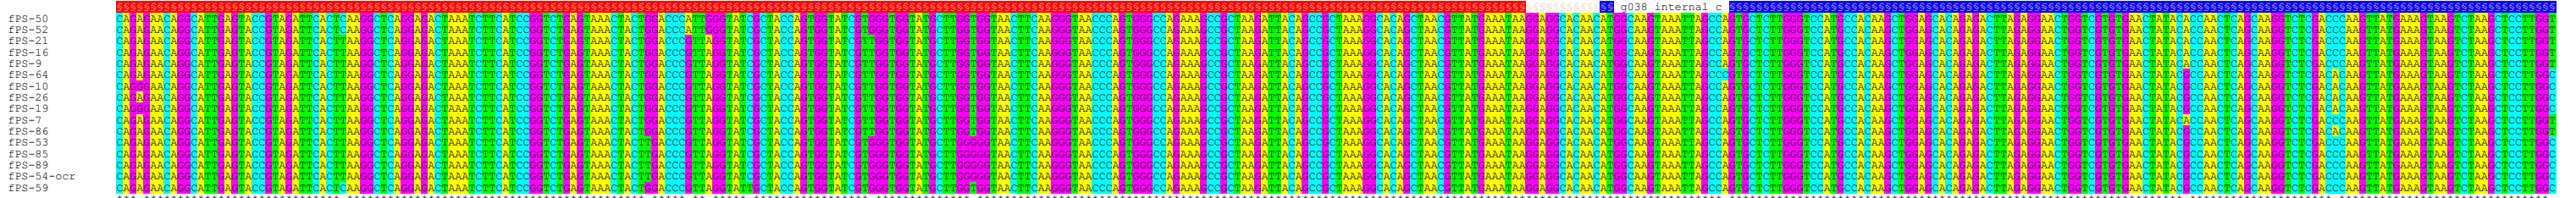







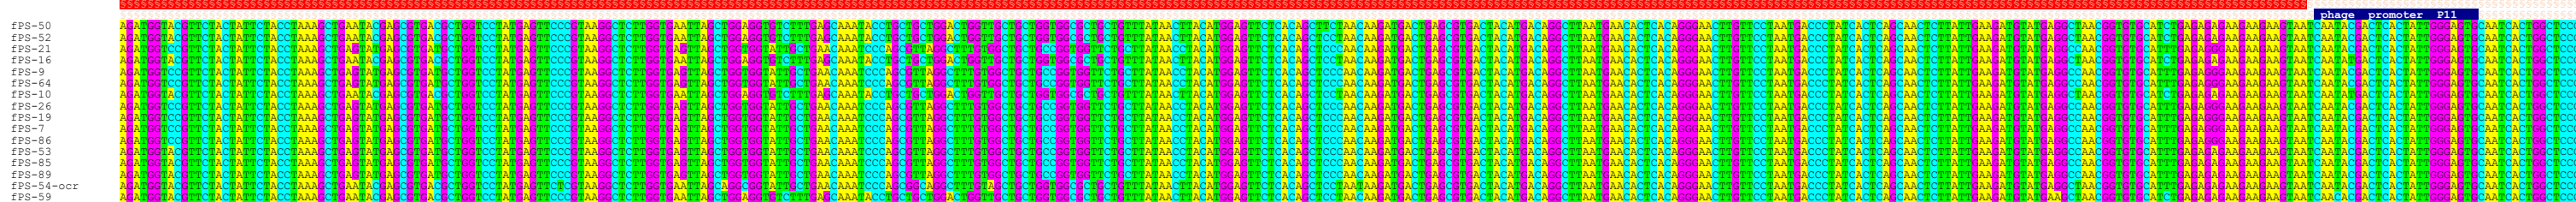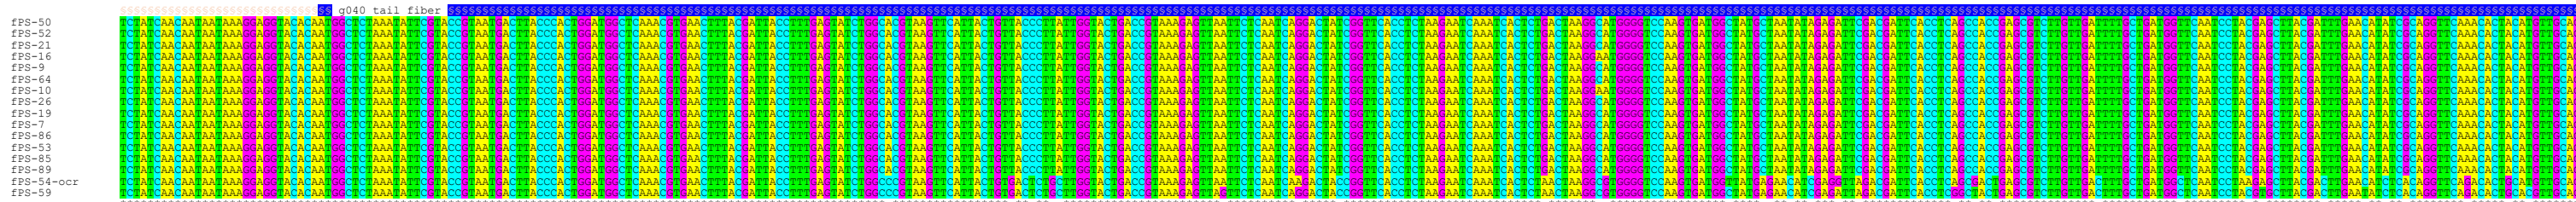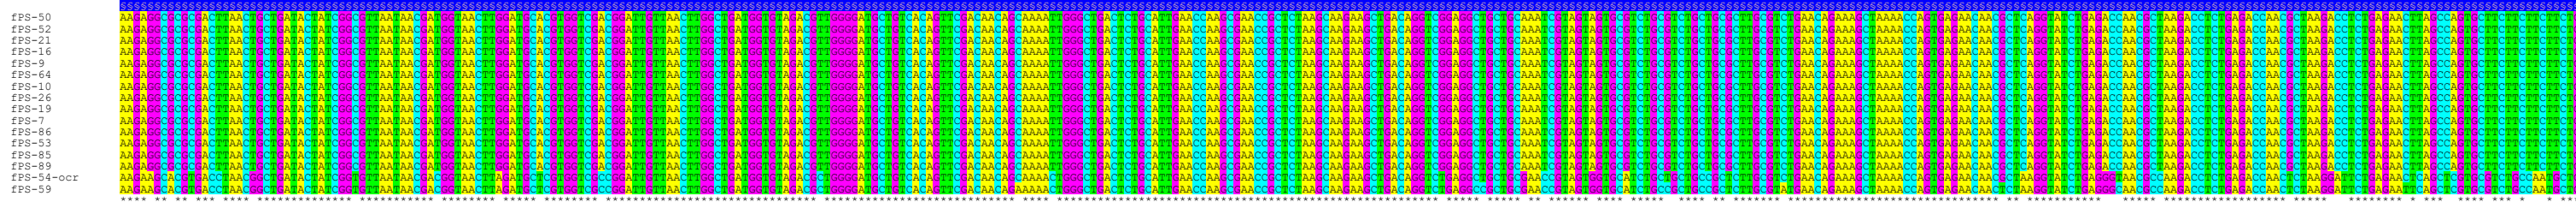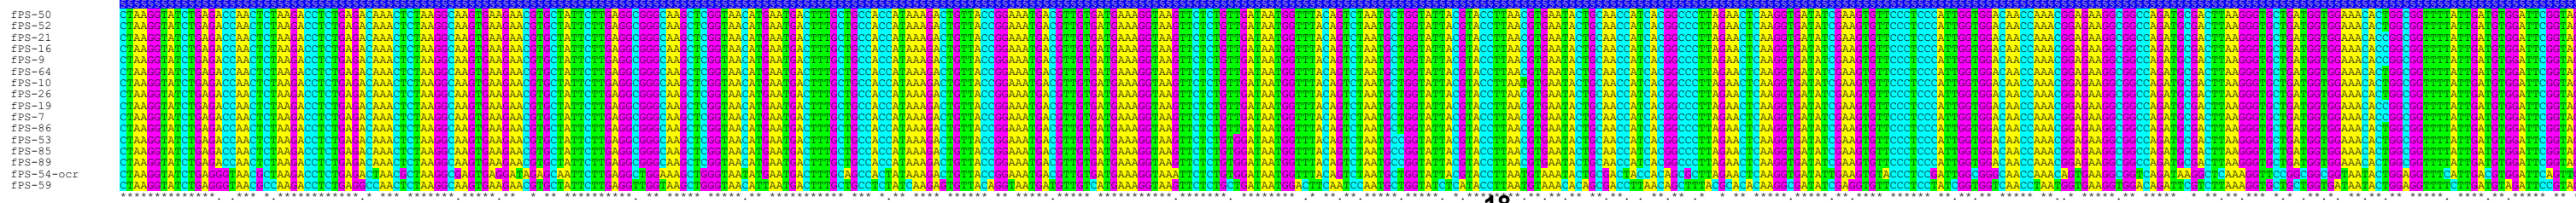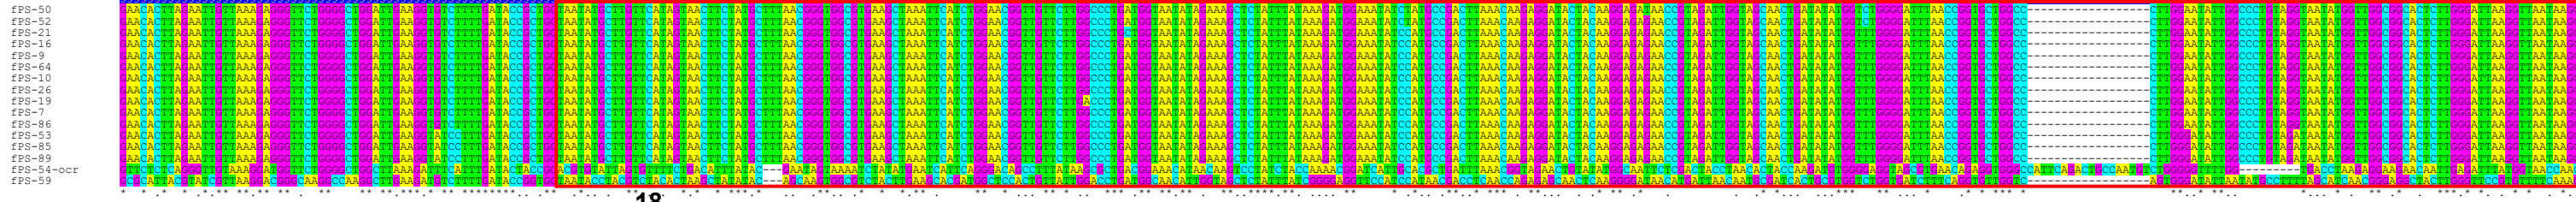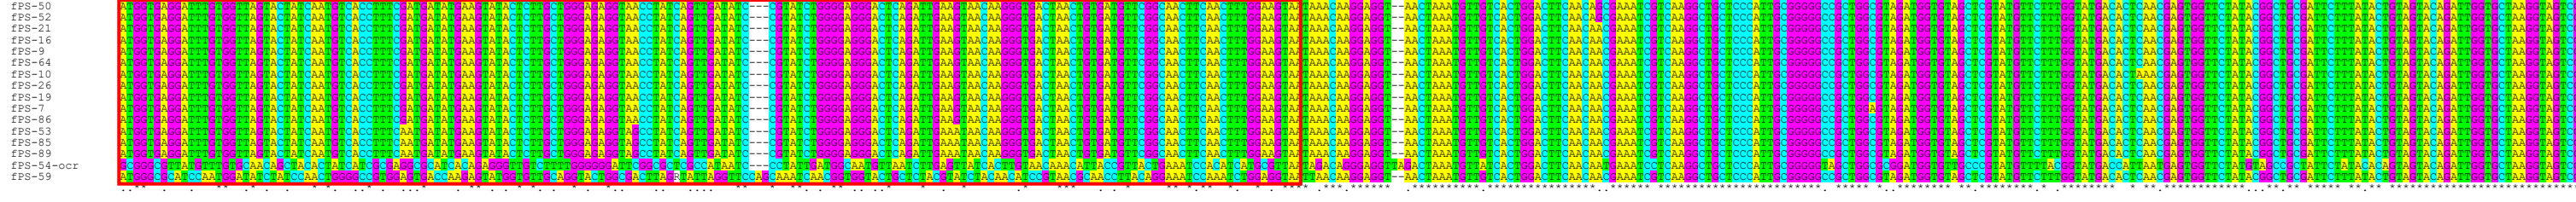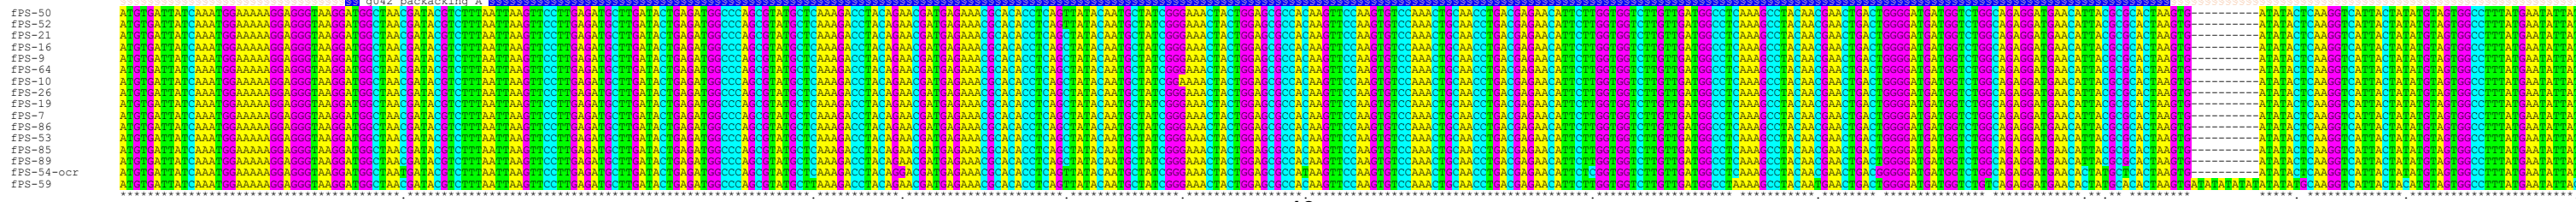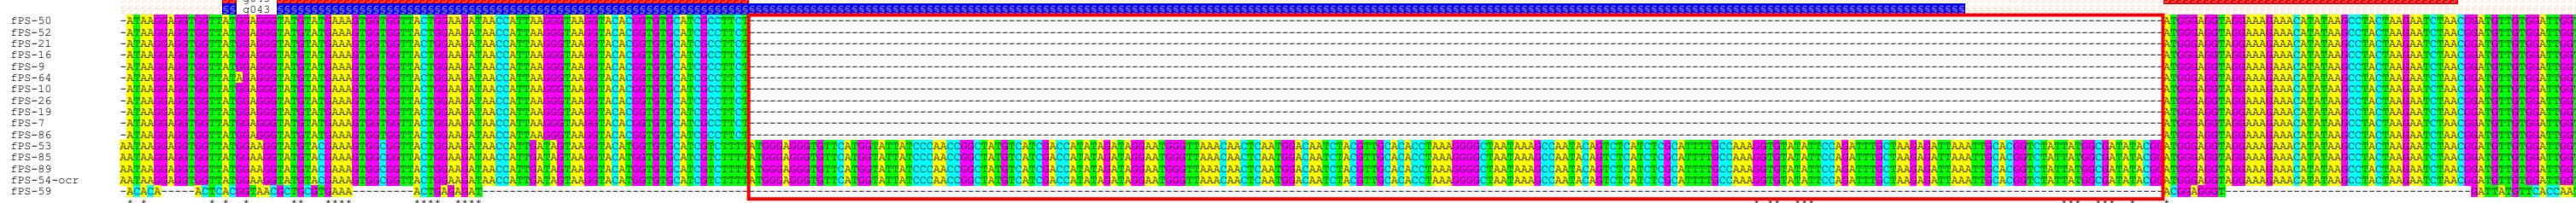



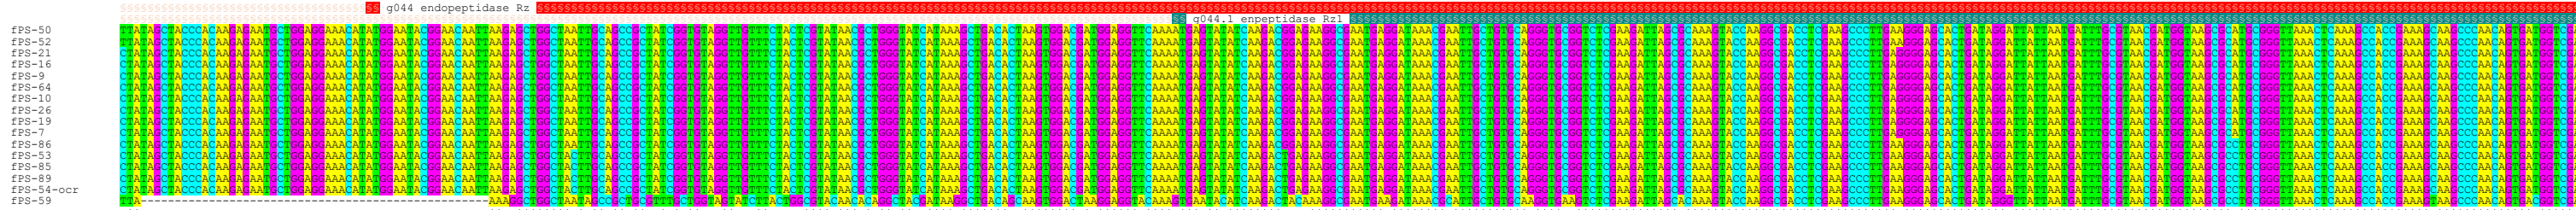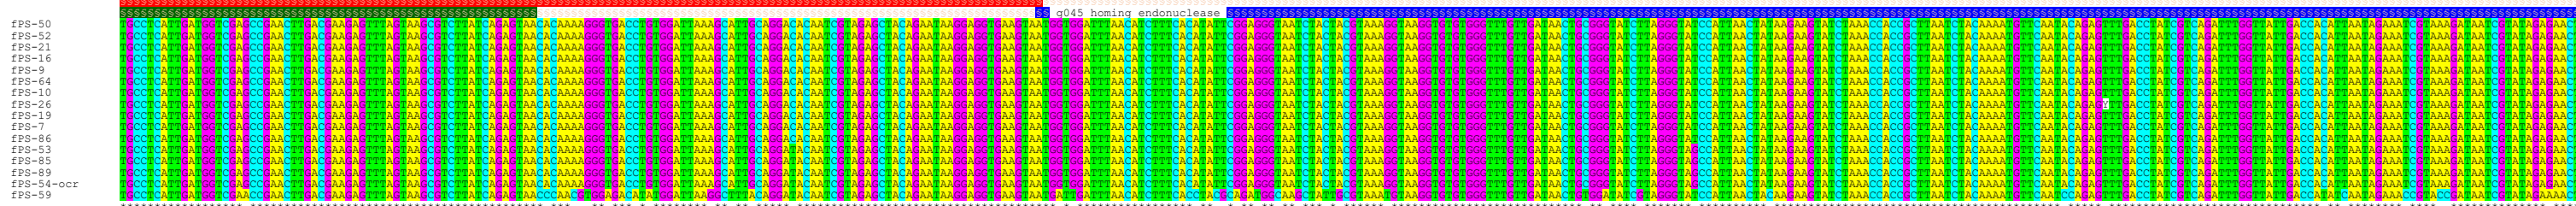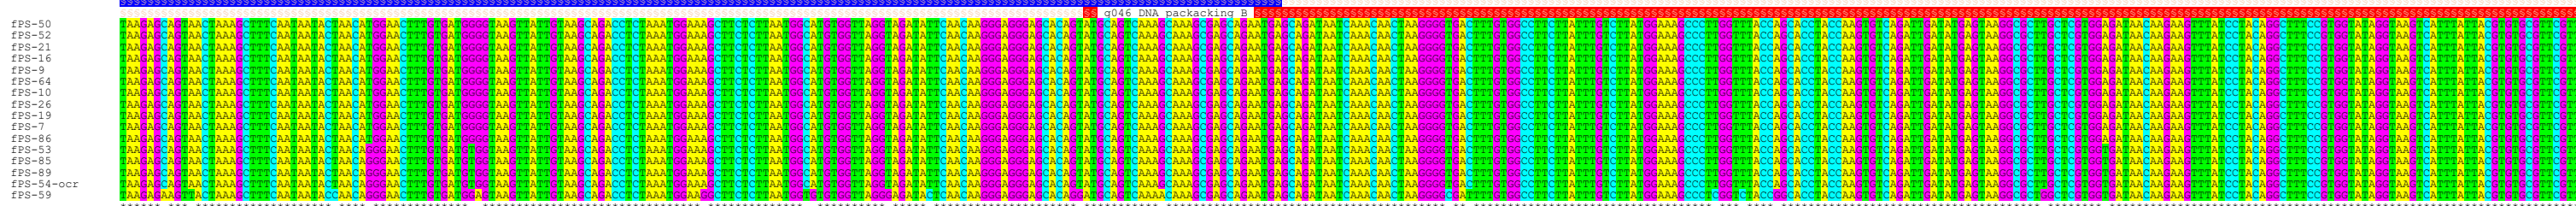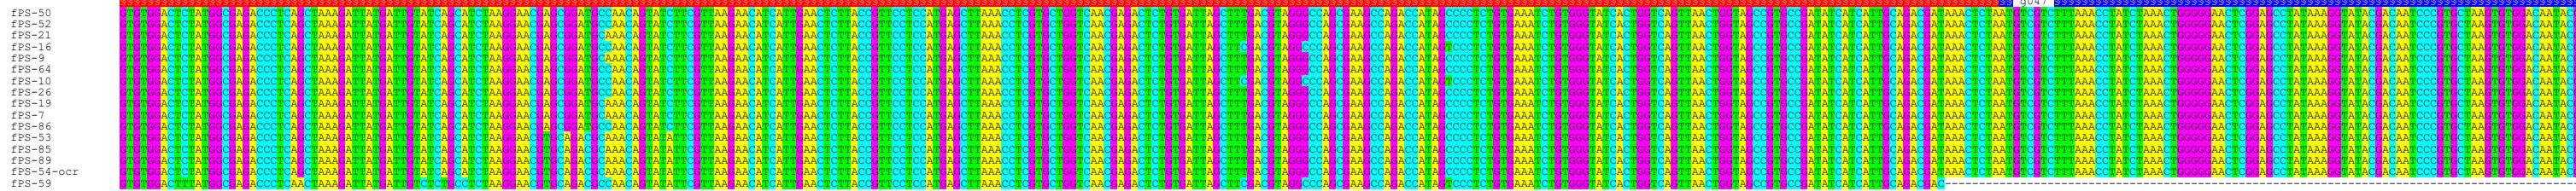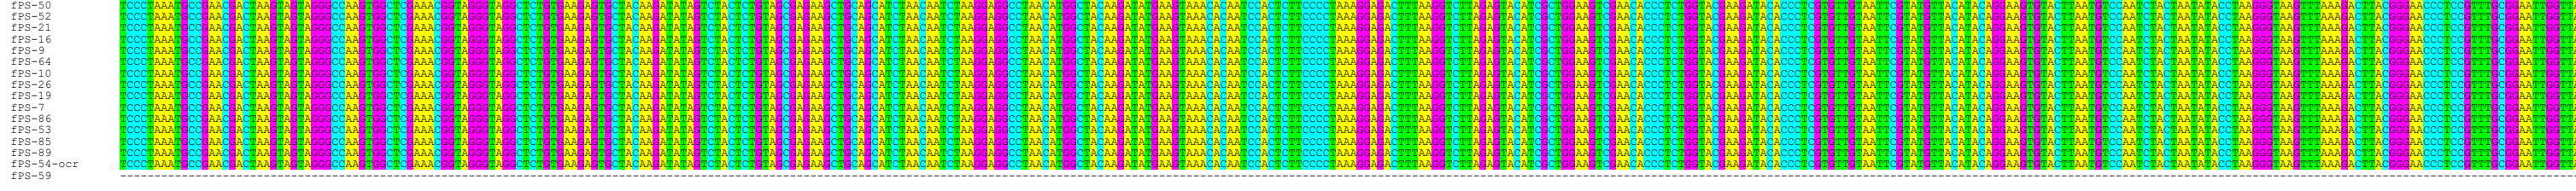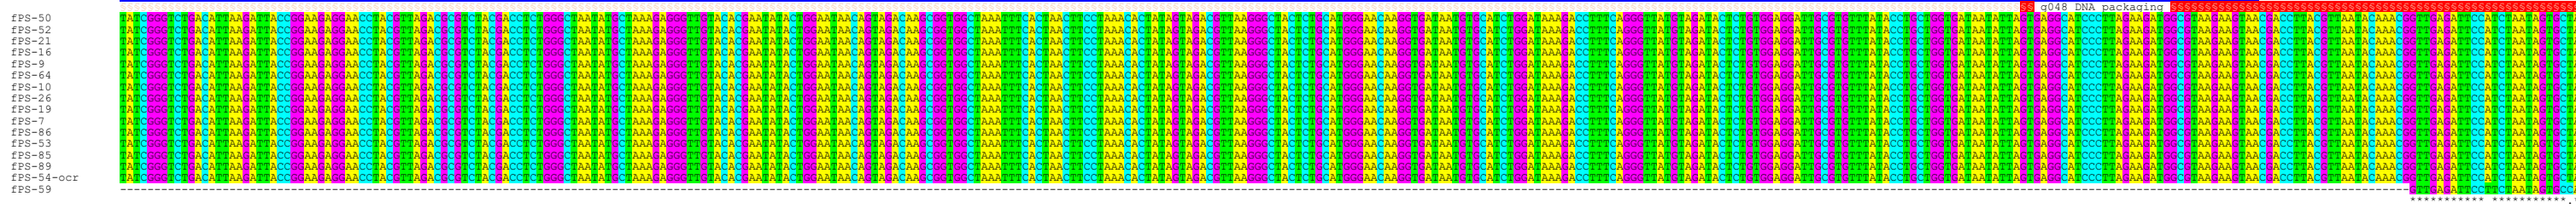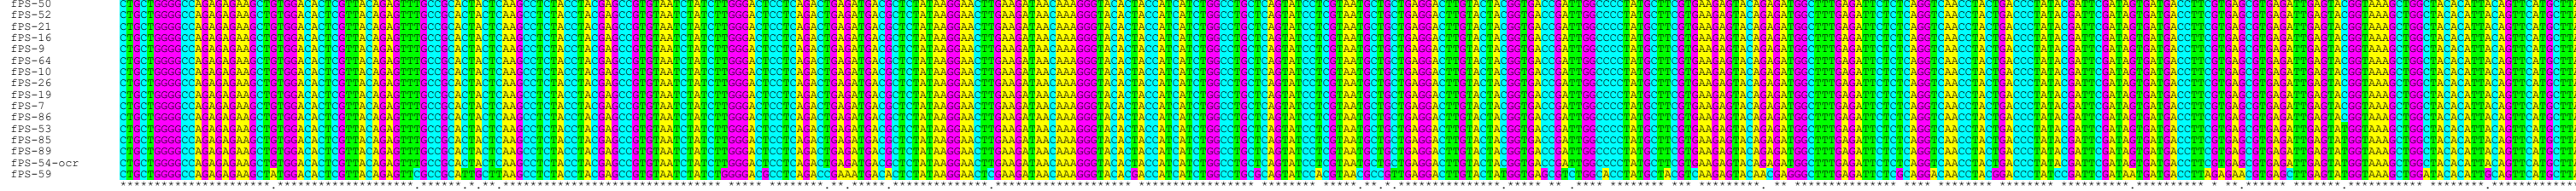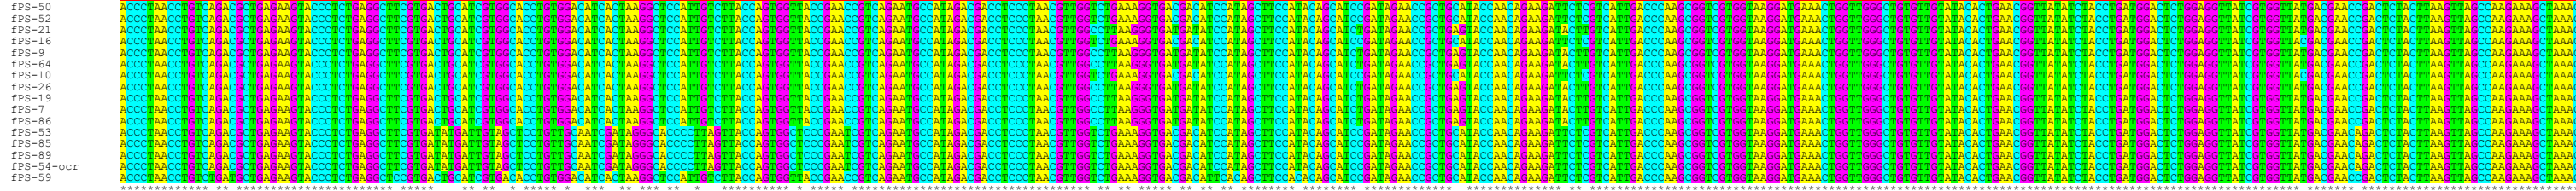





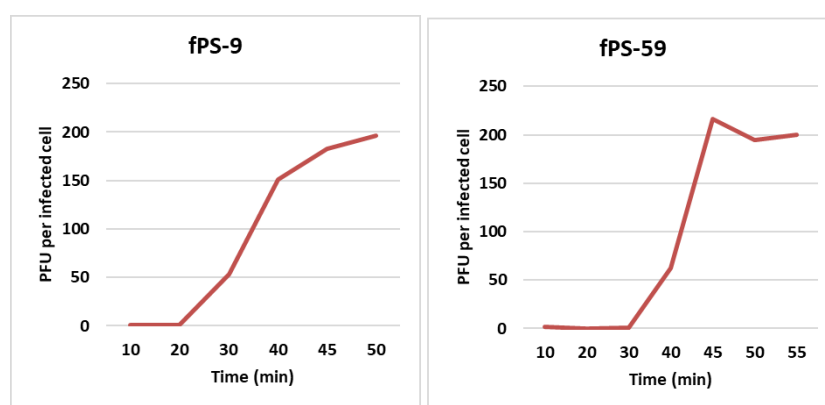

**Figure S4.** One-step growth curves of phages fPS-9 and fPS-59. Experiments were done in duplicate on at least two different occasions and the results of a representative experiment are shown.

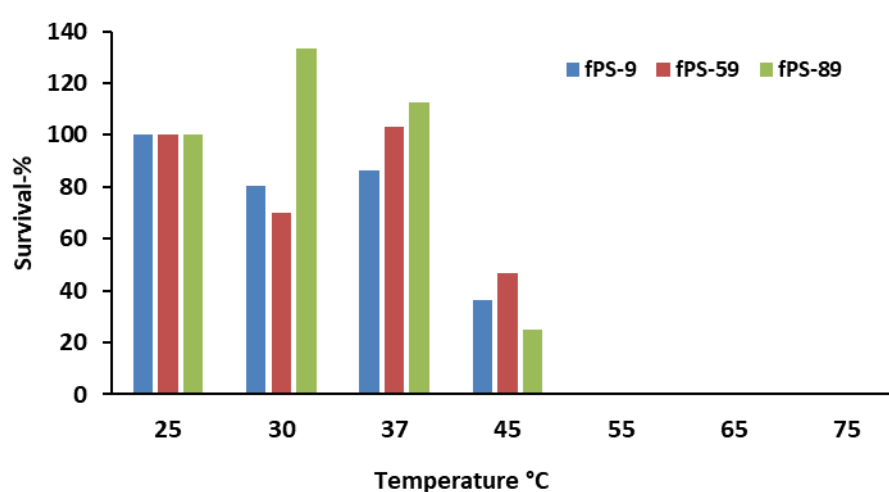

**Figure S5.** Thermal stability of phages fPS-9, fPS-59 and fPS-89. The PFU values of phages incubated at 25 °C were set to 100% and the survival-% of the phages at different temperatures were calculated relative to that. All values represent the means of two experiments.

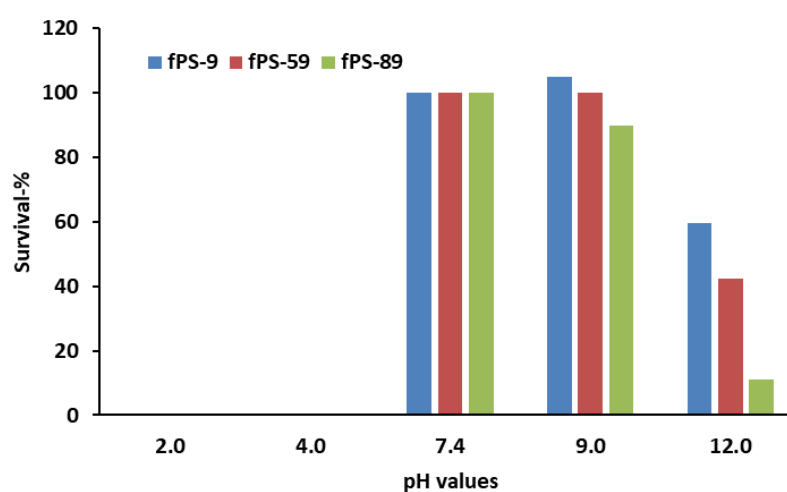

**Figure S6.** The effect of pH on the stability of phages fPS-9, fPS-59 and fPS-89. The PFU values of phages incubated at pH 7.4 were set to 100% and the survival-% of the phages exposed to different pH were calculated relative to that.

2. Supplementary tables

**Table S1.** Comparison of the amino acid sequences of the fPS-phage gene products to those of fPS-7. Also similarities to phage T7, T3 and ©YeO3-12 gene products are indicated. Identity-% is indicated by different colors. Dark green = 100% identity; Green = 97-99% identity; lighter green = 94-96% identity; lightest green = 90-93% identity; light blue = 70-89 % identity; Light grey = 30-70% identity. Light gold = gene not present in fPS-7. HP = hypothetical protein.

| Predicted function                 | Group Ib     |              | Group Ia     |              |              |              |              |              |              |              |              | Group II     |              |               |              | Group III    | Most closest hit in BLASTP                                  | E-value | T7                           | T3                  | Veo3-12                      |
|------------------------------------|--------------|--------------|--------------|--------------|--------------|--------------|--------------|--------------|--------------|--------------|--------------|--------------|--------------|---------------|--------------|--------------|-------------------------------------------------------------|---------|------------------------------|---------------------|------------------------------|
|                                    | fPS-50       | fPS-52       | fPS-64       | fPS-10       | fPS-9        | fPS-16       | fPS-21       | fPS-7        | fPS-19       | fPS-86       | fPS-26       | fPS-53       | fPS-89       | fPS-85        | fPS-54-ocr   | fPS-59       |                                                             |         |                              |                     |                              |
| HP                                 |              |              |              |              |              |              |              |              |              |              |              |              |              |               |              | Gp001        | Nostoc piscinale HP, 54%                                    | 2e-22   | -                            | -                   | -                            |
| HP                                 | Gp001 (100%) | Gp001 (99%)  | Gp001 (83%)  | Gp001 (100%) | Gp001 (83%)  | Gp001 (83%)  | Gp001 (83%)   | Gp001 (83%)  | Gp002 (85%)  | Pectobacterium phage PPWS4, HP (36%)                        | 1e-06   | -                            | -                   | -                            |
| Protein kinase                     |              |              |              |              |              |              |              |              |              |              |              | Gp002 (100%) | Gp002 (100%) | Gp002 (100%)  | Gp002 (100%) |              | Pectobacterium phage PP47, protein kinase (45%)             | 8e-65   | Proteinkinase (45%)          | Proteinkinase (44%) | Proteinkinase (43%)          |
| RNA polymerase                     | Gp002 (99%)  | Gp002 (99%)  | Gp002 (99%)  | Gp002 (100%) | Gp002 (100%) | Gp002 (100%) | Gp002 (100%) | Gp002 (99%)  | Gp002 (99%)  | Gp002 (99%)  | Gp002 (99%)  | Gp003 (98%)  | Gp003 (98%)  | Gp003 (98%)   | Gp003 (99%)  | Gp003 (99%)  | Erwinia phage FE44, RNA polymerase (83%)                    | 0.0     | Gp1, RNAP (73%)              | RNAP (74%)          | RNAP (74%)                   |
| HP                                 | Gp003 (90%)  | Gp003 (90%)  | Gp003 (98%)  | Gp003 (100%) | Gp003 (98%)  | Gp003 (98%)  | Gp003 (98%)  |              |              |               |              |              | Citrobacter phage SH1, HP (59%)                             | 9e-07   | -                            | -                   | -                            |
| HP                                 | Gp004 (100%) | Gp004 (100%) |              |              |              |              |              |              |              |              |              |              |              |               |              |              | Citrobacter phage SH1, HP (60%)                             |         | -                            | -                   | -                            |
| HP                                 | Gp005 (100%) | Gp005 (100%) | Gp004 (100%)  | Gp004 (100%) | Gp004 (100%) | Proteus phage vB_PmiP_PmS460, HP (51%)                      | 0.18    | Gp 1.1 (46%)                 | -                   | -                            |
| HP                                 | Gp006 (99%)  | Gp006 (99%)  | Gp005 (100%) | Gp005 (99%)  | Gp005 (100%) | Gp005 (100%) | Gp005 (100%) | Gp005 (94%)  | Gp005 (95%)  | Gp005 (94%)   | Gp005 (95%)  | Gp005 (95%)  | No significant similarity                                   | -       | -                            | -                   | -                            |
| DNA ligase                         | Gp007 (100%) | Gp007 (99%)  | Gp006 (99%)  | Gp006 (100%) | Gp006 (99%)   | Gp006 (99%)  | Gp006 (99%)  | Yersinia phage vB_YenP_AP10, DNA ligase (58%)               | 9e-135  | DNA ligase (57%)             | -                   | DNA ligase (55%)             |
| Phage protein                      | Gp008 (97%)  | Gp008 (97%)  | Gp007 (100%) | Gp007 (98%)  | Gp007 (100%) | Gp007 (95%)  | Gp007 (95%)  | Gp007 (95%)   | Gp007 (95%)  | Gp007 (97%)  | Enterobacter phage E-3, HP (51%)                            | 2e-22   | HP (42%)                     | HP (48%)            | -                            |
| HP                                 | Gp009 (98%)  | Gp009 (98%)  | Gp008 (100%) | Gp008 (100%) | Gp008 (100%) | Gp008 (99%)  | Gp008 (99%)  | Gp008 (99%)  | Gp008 (100%) | Gp008 (100%) | Gp008 (100%) | Gp008 (99%)  | Gp008 (99%)  | Gp008 (99%)   | Gp008 (99%)  | Gp008 (98%)  | Citrobacter phage CR8, HP (78%)                             | 8e-45   | -                            | -                   | -                            |
| Host RNA polymerase inhibitor      | Gp010 (100%) | Gp010 (100%) | Gp009 (100%)  | Gp009 (100%) | Gp009 (100%) | Escherichia phage P483, host RNA polymerase inhibitor (68%) | 2e-23   | Host RNAP inh (61%)          | Host RNAP inh (60%) | Host RNAP inh (52%)          |
| Putative                           | Gp011 (99%)  | Gp011 (99%)  | Gp010 (99%)  | Gp010 (100%) | Gp010 (99%)   | Gp010 (99%)  | Gp010 (99%)  | Pseudomonas sp. KGP01, HP (46%)                             | 8e-26   | -                            | -                   | -                            |
| ssDNA-binding protein              | Gp012 (99%)  | Gp012 (99%)  | Gp011 (99%)  | Gp011 (100%) | Gp011 (99%)  | Gp011 (100%) | Gp011 (100%) | Gp011 (99%)  | Gp011 (99%)  | Gp011 (99%)  | Gp011 (99%)  | Gp011 (98%)  | Gp011 (98%)  | Gp011 (98%)   | Gp011 (98%)  | Gp011 (97%)  | Escherichia phage P694, ssDNA-binding protein (76%)         | 3e-105  | Gp 2.5 (62%)                 | ssDNA-bp (58%)      | ssDNA-bp (59%)               |
| Phage protein                      |              |              |              |              |              |              |              |              |              |              |              |              |              |               |              | Gp012        | Erwinia phage FE44, HP (74%)                                | 2e-71   | HP (74%)                     | -                   | -                            |
| Phage endonuclease                 | Gp013 (100%) | Gp013 (100%) | Gp012 (100%)  | Gp012 (99%)  | Gp013 (76%)  | Yersinia phage phiYeO3-12, endonuclease (88%)               | 1e-88   | endonuclease (78%)           | endonuclease (82%)  | endonuclease (88%)           |
| Phage lysin, N-AcMur-L-ala amidase | Gp014 (97%)  | Gp014 (97%)  | Gp013 (100%) | Gp013 (100%) | Gp013 (97%)  | Gp013 (100%) | Gp013 (100%) | Gp013 (97%)  | Gp013 (100%) | Gp013 (100%) | Gp013 (99%)  | Gp013 (100%) | Gp013 (100%) | Gp013 (100%)  | Gp013 (100%) | Gp014 (93%)  | Escherichia phage P694, N-AcMur-L-alanine amidase (86%)     | 2e-97   | Gp 3.5 (70%)                 | -                   | N-AcMur-L-ala amidase (72%)  |
| Homing endonuclease                | Gp015 (99%)  | Gp015 (98%)  | Gp014 (100%) | Gp014 (96%)  | Gp014 (96%)  | Gp013.1 (96%) | Gp014 (96%)  | Gp015 (93%)  | Enterobacter phage T7, HP (74%)                             | 5e-61   | Gp 3.8 (73%)                 | -                   | -                            |
| Primase / helicase                 | Gp016 (99%)  | Gp016 (99%)  | Gp015 (100%) | Gp015 (99%)  | Gp015 (100%) | Gp015 (99%)  | Gp015 (99%)  | Gp014 (99%)   | Gp015 (99%)  | Gp016 (99%)  | Yersinia phage Berlin, Helicase (77%)                       | 0.0     | DNA primase / helicase (69%) | helicase (72%)      | DNA primase / helicase (70%) |
| HP                                 | Gp017 (100%) | Gp017 (100%) | Gp016 (100%) | Gp015 (100%)  | Gp017 (95%)  | Gp017 (95%)  | No significant similarity                                   |         | -                            | -                   | -                            |
| HP                                 | Gp018 (100%) | Gp018 (100%) | Gp017 (100%) | Gp016 (100%)  | Gp018 (99%)  | Gp018 (99%)  | Morganella phage vB_MmoP_MP2, HP (45%)                      | 3e-07   | HP (43%)                     | -                   | -                            |
| Phage protein                      | Gp019 (100%) | Gp019 (100%) | Gp018 (98%)  | Gp018 (98%)  | Gp017 (98%)   | Gp017 (100%) | Gp019 (100%) | Escherichia phage P694, HP (76%)                            | 3e-38   | HP (63%)                     | gene 4.5 (54%)      | -                            |
| Phage protein                      |              |              |              |              |              |              |              |              |              |              |              | Gp019 (100%) | Gp019 (100%) | Gp018 (100%)  | Gp018 (95%)  | Gp020 (95%)  | Kluyvera phage Kvp1, phage protein (42%)                    | 2e-18   | HP (39%)                     | -                   | -                            |
| Phage DNA polymerase               | Gp020 (99%)  | Gp020 (99%)  | Gp019 (99%)  | Gp019 (99%)  | Gp019 (100%) | Gp019 (99%)  | Gp020 (98%)  | Gp020 (98%)  | Gp019 (98%)   | Gp019 (98%)  | Gp021 (98%)  | Kluyvera phage Kvp1, DNA polymerase (83%)                   | 0.0     | DNA pol (71%)                | DNA pol (71%)       | DNA pol (69%)                |
| HNS binding protein                | Gp021 (100%) | Gp021 (100%) | Gp020 (99%)  | Gp021 (81%)  | Gp021 (81%)  | Gp020 (81%)   | Gp020 (81%)  | Gp022 (84%)  | Leclercia phage 10164-302, HP (38%)                         | 3e-08   | -                            | gene 5.5 (37%)      | HP (37%)                     |
| HNS binding protein                | Gp022 (100%) | Gp022 (100%) | Gp021 (100%) | Gp022 (100%) | Gp022 (100%) | Gp021 (100%)  | Gp021 (100%) | Gp023 (99%)  | Salmonella phage BP12A, HP (91%)                            | 2e-40   | Gp 5.7 (75%)                 | -                   | Gp 5.7 (81%)                 |
| HP                                 | Gp023 (100%) | Gp023 (100%) | Gp022 (100%) | Gp023 (82%)  | Gp023 (82%)  | Gp022 (82%)   | Gp022 (82%)  | Gp024 (82%)  | Salmonella phage BP12A, HP (71%)                            | 5e-35   | -                            | -                   | -                            |
| Phage exonuclease                  | Gp024 (100%) | Gp024 (100%) | Gp023 (100%) | Gp024 (100%) | Gp024 (100%) | Gp023 (100%)  | Gp023 (100%) | Gp025 (99%)  | Escherichia phage P694, exonuclease (76%)                   | 3e-167  | exonuclease (69%)            | exonuclease (68%)   | exonuclease (73%)            |
| HP                                 |              |              |              |              |              |              |              |              |              |              |              |              |              |               |              | Gp026        | No similarity                                               | -       | -                            | -                   | -                            |
| Phage protein                      | Gp025 (100%) | Gp025 (100%) | Gp025 (100%) | Gp024 (100%) | Gp025 (100%) | Gp025 (100%) | Gp024 (100%)  | Gp024 (100%) | Gp027 (100%) | Salmonella phage BP12A, HP (73%)                            | 2e-34   | HP (45%)                     | HP (48%)            | Gp 6.5 (50%)                 |
| HP (?homing endonuclease)          | Gp026 (100%) | Gp026 (100%) |              |              |              |              |              |              |              |              |              |              |              |               |              |              | Enterobacteria phage 13a, gp7.7 (50%)                       | 1e-34   | HP (45%)                     | -                   | -                            |
| HP                                 |              |              | Gp026 (95%)  | Gp025 (98%)  | Gp025 (100%) | Gp025 (95%)  |              |              |               |              |              | Branchiostoma floridae, HP (44%)                            | 0.056   | -                            | -                   | -                            |
| Phage protein                      |              |              | Gp027 (100%) | Gp026 (97%)  | Gp026 (100%) | Gp026 (97%)  | Gp026 (100%) | Gp026 (96%)  | Gp026 (96%)  | Gp025 (96%)   | Gp025 (97%)  |              | Pectobacterium phage PP74, HNH homing endonuclease (65%)    | 6e-16   | HP (53%)                     | -                   | -                            |
| Phage protein                      |              |              | Gp028 (100%) | Gp027 (100%) |              |              |               |              |              | Erwinia phage FE44, HP (66%)                                | 2e-19   | HP (55%)                     | HP (51%)            | HP (51%)                     |
| Phage protein                      | Gp027 (87%)  | Gp027 (88%)  | Gp029 (100%) | Gp028 (100%) | Gp028 (100%) | Gp           |              |              |              |              |              |              |              |               |              |              |                                                             |         |                              |                     |                              |

**Table S3.** Predicted promoter and terminator sequences and locations of Yersinia phage fPS-7

| Host RNAP promoters<br>(-35 and -10 boxes)                         | 5' -end<br>pos. | Downstream gene (product)                        |
|--------------------------------------------------------------------|-----------------|--------------------------------------------------|
| TCCACA (N) <sub>14</sub> ACCTATAGT                                 | 49              | <i>g001</i> (hypothetical protein)               |
| TTAAAG (N) <sub>14</sub> TCTTAAAGT                                 | 549             | <i>g001</i> (hypothetical protein)               |
| ATGGAA (N) <sub>12</sub> GCTTATTAT                                 | 867             | <i>g002</i> (RNA polymerase), within <i>g001</i> |
| TTGCAG (N) <sub>18</sub> GGTTATATT                                 | 1179            | <i>g002</i> (RNA polymerase)                     |
|                                                                    |                 |                                                  |
| Phage RNAP promoters                                               |                 |                                                  |
| TAATACAACCTCACTATTGAGAGA                                           | 471             | <i>g001</i> (hypothetical protein)               |
| TAATAGAACTCACTATTGGGAGC                                            | 3963            | <i>g003</i> (hypothetical protein)               |
| TAATACAACCTCACTATTGAGAAA                                           | 4237            | <i>g004</i> (hypothetical protein)               |
| TAATGGAACCTCACTATTGGGAGA                                           | 5924            | <i>g007</i> (hypothetical protein)               |
| TAATAGAACTCACTATTGAGAAC                                            | 7348            | <i>g011</i> (ssDNA-binding protein)              |
| TAATAGAACTCACTATTGGGAGA                                            | 9014            | <i>g014</i> (homing endonuclease)                |
| TAATACGACTCACTATTGAGAGG                                            | 15834           | <i>g024</i> (phage protein)                      |
| TAATACGACTCACTATTGGGAGA                                            | 19245           | <i>g031</i> (capsid protein)                     |
| TAATGCGACTCACTATTGGGAGA                                            | 20230           | <i>g032</i> (capsid protein)                     |
| CAATACGACTCACTATTGAGAGG                                            | 24598           | <i>g036</i> (core protein)                       |
| CAATACGACTCACTATTGGGAGT                                            | 31893           | <i>g040</i> (tail fiber protein)                 |
| TAATACGACTCACTATTGAGAGA                                            | 38139           | <i>g050</i> (phage protein)                      |
| Consensus promoter                                                 |                 |                                                  |
| TAATACGACTCACTATTGGGAGA                                            |                 |                                                  |
|                                                                    |                 |                                                  |
| Rho-independent terminators (hairpin stem in blue and loop in red) |                 |                                                  |
| AGTACACACATGGTCAACCTACGGGTGGCCTTTTTGCGTTTT                         | 5882            | <i>g007</i>                                      |
| GACTCACTATTGGGAGACACATTATGTTTCCCTTTAGTTTTAAC                       | 19251           | <i>g031</i>                                      |
| AACTATATGAAACCCCTTGGGTGACCTTAACGGGTACTTGAGGGGTTTTTTTTCTGAAA        | 21532           | <i>g034</i>                                      |
| TAACAGTAAATGCCTCTTTC AATACGACTCACTATTGAGAGGGGCTTTATTCATTAAGG       | 24579           | <i>g036</i>                                      |

**Table S4.** Predicted promoter and terminator sequences and locations of Yersinia phage fPS-9

| <b>Host RNAP promoters<br/>(-35 and -10 boxes)</b>                        | <b>5'-end<br/>pos.</b> | <b>Downstream gene (product)</b>    |
|---------------------------------------------------------------------------|------------------------|-------------------------------------|
| TCCACA (N) <sub>14</sub> ACCTATAGT                                        | 49                     | <i>g001</i> (hypothetical protein)  |
| TTAAAG (N) <sub>14</sub> TCTTAAAGT                                        | 626                    | <i>g001</i> (hypothetical protein)  |
| GTGATT (N) <sub>15</sub> CAGTATACT                                        | 1046                   | <i>g002</i> (RNA polymerase)        |
|                                                                           |                        |                                     |
| <b>Phage RNAP promoters</b>                                               |                        |                                     |
| TAATACAACCTCACTATTGAGAGA                                                  | 548                    | <i>g001</i> (hypothetical protein)  |
| TAATACAACCTCACTATTGAGAGA                                                  | 847                    | <i>g001</i> (hypothetical protein)  |
| TAATAGAACTCACTATTGGGAGC                                                   | 4040                   | <i>g003</i> (hypothetical protein)  |
| TAATACAACCTCACTATTGAGAAA                                                  | 4314                   | <i>g004</i> (hypothetical protein)  |
| TAATGGAACCTCACTATTGGGAGA                                                  | 6001                   | <i>g007</i> (phage protein)         |
| TAATAGAACTCACTATTGAGAAC                                                   | 7425                   | <i>g011</i> (ssDNA-binding protein) |
| TAATAGAACTCACTATTGGGAGA                                                   | 9091                   | <i>g014</i> (homing endonuclease)   |
| TAATACGACTCACTATTGAGAGG                                                   | 15908                  | <i>g024</i> (phage protein)         |
| TAATACGACTCACTATTGGGAGA                                                   | 19319                  | <i>g031</i> (capsid protein)        |
| TAATGCGACTCACTATTGGGAGA                                                   | 20304                  | <i>g032</i> (capsid protein)        |
| CAATACGACTCACTATTGAGAGG                                                   | 24672                  | <i>g036</i> (core protein)          |
| CAATACGACTCACTATTGGGAGT                                                   | 31967                  | <i>g040</i> (tail fiber protein)    |
| TAATACGACTCACTATTGAGAGA                                                   | 38126                  | <i>g051</i> (phage protein)         |
| <b>Consensus promoter</b>                                                 |                        |                                     |
| TAATACGACTCACTATTGGGAGA                                                   |                        |                                     |
|                                                                           |                        |                                     |
| <b>Rho-independent terminators (hairpin stem in blue and loop in red)</b> |                        |                                     |
| AGTACACACATGGTCAACCTACGGGTGGCCTTTTTTCGTTTT                                | 5959                   | <i>g007</i>                         |
| AACTCACTATTGGGAGACCTTAACGGTTTCCCTTTGTTTCGCTTC                             | 9097                   | <i>g014</i>                         |
| GACTCACTATTGGGAGACACATTATGTTTCCCTTTAGTTTTAAC                              | 19325                  | <i>g031</i>                         |
| AACTATATGAAACCCCTTGGGTGACCTTAACGGGTACTTGAGGGGTTTTTTTTCTGAAA               | 21606                  | <i>g034</i>                         |
| TAACAGTAAATGCCTCTTCAATACGACTCACTATTGAGAGGGGCTTTATTCATTAAGG                | 24653                  | <i>g036</i>                         |

**Table S5.** Predicted promoter and terminator sequences and locations of Yersinia phage fPS-10

| <b>Host RNAP promoters<br/>(-35 and -10 boxes)</b>                        | <b>5'-end<br/>pos.</b> | <b>Downstream gene (product)</b>                 |
|---------------------------------------------------------------------------|------------------------|--------------------------------------------------|
| TCCACA (N) <sub>13</sub> ACCTATAGT                                        | 50                     | <i>g001</i> (hypothetical protein)               |
| CTGAGT (N) <sub>17</sub> GAGTATCAT                                        | 361                    | <i>g001</i> (hypothetical protein)               |
| TTAAAG (N) <sub>14</sub> TCTTAAAGT                                        | 684                    | <i>g001</i> (hypothetical protein)               |
| ATGGAA (N) <sub>12</sub> GCTTATTAT                                        | 1002                   | <i>g002</i> (RNA polymerase), within <i>g001</i> |
| TTGCAG (N) <sub>18</sub> GGTATATT                                         | 1314                   | <i>g002</i> (RNA polymerase)                     |
|                                                                           |                        |                                                  |
| <b>Phage RNAP promoters</b>                                               |                        |                                                  |
| TAATACAACCTCACTATTGAGAGA                                                  | 606                    | <i>g001</i> (hypothetical protein)               |
| TAATAGAACTCACTATTGGGAGC                                                   | 4098                   | <i>g003</i> (hypothetical protein)               |
| TAATACAACCTCACTATTGAGAAA                                                  | 4372                   | <i>g004</i> (hypothetical protein)               |
| TAATGGAACCTCACTATTGGGAGA                                                  | 6059                   | <i>g007</i> (phage protein)                      |
| TAATAGAACTCACTATTGAGAAC                                                   | 7483                   | <i>g011</i> (ssDNA-binding protein)              |
| TAATAGAACTCACTATTGGGAGA                                                   | 9149                   | <i>g014</i> (homing endonuclease)                |
| TAATACGACTCACTATTGAGAGG                                                   | 15966                  | <i>g024</i> (phage protein)                      |
| TAATACGACTCACTATTGGGAGA                                                   | 19376                  | <i>g031</i> (capsid protein)                     |
| TAATGCGACTCACTATTGGGAGA                                                   | 20361                  | <i>g032</i> (capsid protein)                     |
| CAATACGACTCACTATTGAGAGG                                                   | 24729                  | <i>g036</i> (core protein)                       |
| CAATATGACTCACTATTGGGAGT                                                   | 32024                  | <i>g040</i> (tail fiber protein)                 |
| TAATACGACTCACTATTGAGAGA                                                   | 38269                  | <i>g050</i> (phage protein)                      |
| <b>Consensus promoter</b>                                                 |                        |                                                  |
| TAATACGACTCACTATTGGGAGA                                                   |                        |                                                  |
|                                                                           |                        |                                                  |
| <b>Rho-independent terminators (hairpin stem in blue and loop in red)</b> |                        |                                                  |
| AGTACACACATGGTCAACCTACGGGTGGCCTTTTTTCGTTTT                                | 6017                   | <i>g007</i>                                      |
| GACTCACTATTGGGAGACACATTATGTTTCCCTTTAGTTTTAAC                              | 19382                  | <i>g031</i>                                      |
| AACTATATGAAACCCCTTGGGTGACCTTAACGGGTACTTGAGGGGTTTTTTTTCTGAAA               | 21663                  | <i>g034</i>                                      |
| TAACAGTAAATGCCTCTTCAATACGACTCACTATTGAGAGGGCtTTATTCATTAAGG                 | 24710                  | <i>g036</i>                                      |

**Table S6.** Predicted promoter and terminator sequences and locations of Yersinia phage fPS-16

| <b>Host RNAP promoters<br/>(-35 and -10 boxes)</b>                        | <b>5'-end<br/>pos.</b> | <b>Downstream gene (product)</b>                 |
|---------------------------------------------------------------------------|------------------------|--------------------------------------------------|
| TCCACA (N) <sub>14</sub> ACCTATAGT                                        | 49                     | <i>g001</i> (hypothetical protein)               |
| TTAAAG (N) <sub>14</sub> TCTTAAAGT                                        | 548                    | <i>g001</i> (hypothetical protein)               |
| ATGGAA (N) <sub>12</sub> GCTTATTAT                                        | 866                    | <i>g002</i> (RNA polymerase), within <i>g001</i> |
| TTGCAG (N) <sub>18</sub> GGTATATT                                         | 1178                   | <i>g002</i> (RNA polymerase)                     |
|                                                                           |                        |                                                  |
| <b>Phage RNAP promoters</b>                                               |                        |                                                  |
| TAATACAACCTCACTATTGAGAGA                                                  | 470                    | <i>g001</i> (hypothetical protein)               |
| TAATAGAACCTCACTATTGGGAGC                                                  | 3962                   | <i>g003</i> (hypothetical protein)               |
| TAATACAACCTCACTATTGAGAAA                                                  | 4236                   | <i>g004</i> (hypothetical protein)               |
| TAATGGAACCTCACTATTGGGAGA                                                  | 5923                   | <i>g007</i> (phage protein)                      |
| TAATAGAACCTCACTATTGAGAAC                                                  | 7347                   | <i>g011</i> (ssDNA-binding protein)              |
| TAATAGAACCTCACTATTGGGAGA                                                  | 9013                   | <i>g014</i> (homing endonuclease)                |
| TAATACGACTCACTATTGAGAGG                                                   | 15833                  | <i>g024</i> (phage protein)                      |
| TAATACGACTCACTATTGGGAGA                                                   | 19244                  | <i>g031</i> (capsid protein)                     |
| TAATGCGACTCACTATTGGGAGA                                                   | 20229                  | <i>g032</i> (capsid protein)                     |
| CAATACGACTCACTATTGAGAGG                                                   | 24597                  | <i>g036</i> (core protein)                       |
| CAATATGACTCACTATTGGGAGT                                                   | 31892                  | <i>g040</i> (tail fiber protein)                 |
| TAATACGACTCACTATTGAGAGA                                                   | 38137                  | <i>g050</i> (phage protein)                      |
| <b>Consensus promoter</b>                                                 |                        |                                                  |
| TAATACGACTCACTATTGGGAGA                                                   |                        |                                                  |
|                                                                           |                        |                                                  |
| <b>Rho-independent terminators (hairpin stem in blue and loop in red)</b> |                        |                                                  |
| AGTACACACATGGTCAACCTACGGGTGGCCTTTTTGCGTTTT                                | 5881                   | <i>g007</i>                                      |
| GACTCACTATTGGGAGACACATTATGTTTCCCTTTAGTTTTAAC                              | 19250                  | <i>g031</i>                                      |
| AACTATATGAAACCCCTTGGGTGACCTTAACGGGTTACTTGAGGGGTTTTTTTTCTGAAA              | 21531                  | <i>g034</i>                                      |
| TAACAGTAAATGCCTCTTTCAATACGACTCACTATTGAGAGGGGCTTTATTCATTAAGG               | 24578                  | <i>g036</i>                                      |



**Table S7.** Predicted promoter and terminator sequences and locations of Yersinia phage fPS-19

| <b>Host RNAP promoters<br/>(-35 and -10 boxes)</b>                        | <b>5'-end<br/>pos.</b> | <b>Downstream gene (product)</b>                 |
|---------------------------------------------------------------------------|------------------------|--------------------------------------------------|
| TCCACA (N) <sub>14</sub> ACCTATAGT                                        | 49                     | <i>g001</i> (hypothetical protein)               |
| TTAAAG (N) <sub>14</sub> TCTTAAAGT                                        | 548                    | <i>g001</i> (hypothetical protein)               |
| ATGGAA (N) <sub>12</sub> GCTTATTAT                                        | 866                    | <i>g002</i> (RNA polymerase), within <i>g001</i> |
| TTGCAG (N) <sub>18</sub> GGTATATT                                         | 1178                   | <i>g002</i> (RNA polymerase)                     |
|                                                                           |                        |                                                  |
| <b>Phage RNAP promoters</b>                                               |                        |                                                  |
| TAATACAACCTCACTATTGAGAGA                                                  | 470                    | <i>g001</i> (hypothetical protein)               |
| TAATAGAACCTCACTATTGGGAGC                                                  | 3962                   | <i>g003</i> (hypothetical protein)               |
| TAATACAACCTCACTATTGAGAAA                                                  | 4236                   | <i>g004</i> (hypothetical protein)               |
| TAATGGAACCTCACTATTGGGAGA                                                  | 5923                   | <i>g007</i> (phage protein)                      |
| TAATAGAACCTCACTATTGAGAAC                                                  | 7347                   | <i>g011</i> (ssDNA-binding protein)              |
| TAATAGAACCTCACTATTGGGAGA                                                  | 9013                   | <i>g014</i> (homing endonuclease)                |
| TAATACGACTCACTATTGAGAGG                                                   | 15833                  | <i>g024</i> (phage protein)                      |
| TAATACGACTCACTATTGGGAGA                                                   | 19244                  | <i>g031</i> (capsid protein)                     |
| TAATGCGACTCACTATTGGGAGA                                                   | 20229                  | <i>g032</i> (capsid protein)                     |
| CAATACGACTCACTATTGAGAGG                                                   | 24597                  | <i>g036</i> (core protein)                       |
| CAATACGACTCACTATTGGGAGT                                                   | 31892                  | <i>g040</i> (tail fiber protein)                 |
| TAATACGACTCACTATTGAGAGA                                                   | 38137                  | <i>g050</i> (phage protein)                      |
| <b>Consensus promoter</b>                                                 |                        |                                                  |
| TAATACGACTCACTATTGGGAGA                                                   |                        |                                                  |
|                                                                           |                        |                                                  |
| <b>Rho-independent terminators (hairpin stem in blue and loop in red)</b> |                        |                                                  |
| AGTACACACATGGTCAACCTACGGGTTGGCCTTTTTGCGTTTT                               | 5881                   | <i>g007</i>                                      |
| GACTCACTATTGGGAGACACATTATGTTTCCCTTTAGTTTTAAC                              | 19250                  | <i>g031</i>                                      |
| AACTATATGAAACCCCTTGGGTGACCTTAACGGGTTACTTGAGGGGTTTTTTTTCTGAAA              | 21531                  | <i>g034</i>                                      |
| TAACAGTAAATGCCTCTTTCAATACGACTCACTATTGAGAGGGGCTTTATTCATTAAGG               | 24578                  | <i>g036</i>                                      |

**Table S8.** Predicted promoter and terminator sequences and locations of Yersinia phage fPS-21

| <b>Host RNAP promoters<br/>(-35 and -10 boxes)</b>                        | <b>5'-end<br/>pos.</b> | <b>Downstream gene (product)</b>                 |
|---------------------------------------------------------------------------|------------------------|--------------------------------------------------|
| TCCACA (N) <sub>15</sub> ACCTATAGT                                        | 50                     | <i>g001</i> (hypothetical protein)               |
| TTAAAG (N) <sub>14</sub> TCTTAAAGT                                        | 550                    | <i>g001</i> (hypothetical protein)               |
| ATGGAA (N) <sub>12</sub> GCTTATTAT                                        | 868                    | <i>g002</i> (RNA polymerase), within <i>g001</i> |
| TTGCAG (N) <sub>18</sub> GGTATATT                                         | 1180                   | <i>g002</i> (RNA polymerase)                     |
|                                                                           |                        |                                                  |
| <b>Phage RNAP promoters</b>                                               |                        |                                                  |
| TAATACAACCTCACTATTGAGAGA                                                  | 472                    | <i>g001</i> (hypothetical protein)               |
| TAATAGAACCTCACTATTGGGAGC                                                  | 3964                   | <i>g003</i> (hypothetical protein)               |
| TAATACAACCTCACTATTGAGAAA                                                  | 4238                   | <i>g004</i> (hypothetical protein)               |
| TAATGGAACCTCACTATTGGGAGA                                                  | 5925                   | <i>g007</i> (phage protein)                      |
| TAATAGAACCTCACTATTGAGAAC                                                  | 7349                   | <i>g011</i> (ssDNA-binding protein)              |
| TAATAGAACCTCACTATTGGGAGA                                                  | 9015                   | <i>g014</i> (homing endonuclease)                |
| TAATACGACTCACTATTGAGAGG                                                   | 15834                  | <i>g024</i> (phage protein)                      |
| TAATACGACTCACTATTGGGAGA                                                   | 19245                  | <i>g031</i> (capsid protein)                     |
| TAATGCGACTCACTATTGGGAGA                                                   | 20230                  | <i>g032</i> (capsid protein)                     |
| CAATACGACTCACTATTGAGAGG                                                   | 24598                  | <i>g036</i> (core protein)                       |
| CAATACGACTCACTATTGGGAGT                                                   | 31893                  | <i>g040</i> (tail fiber protein)                 |
| TAATACGACTCACTATTGAGAGA                                                   | 38138                  | <i>g050</i> (phage protein)                      |
| <b>Consensus promoter</b>                                                 |                        |                                                  |
| TAATACGACTCACTATTGGGAGA                                                   |                        |                                                  |
|                                                                           |                        |                                                  |
| <b>Rho-independent terminators (hairpin stem in blue and loop in red)</b> |                        |                                                  |
| AGTACACACATGGTCAACCTACGGGTGGCCTTTTTGCGTTTT                                | 5883                   | <i>g007</i>                                      |
| GACTCACTATTGGGAGACACATTATGTTTCCCTTTAGTTTTAAC                              | 19251                  | <i>g031</i>                                      |
| AACTATATGAAACCCCTTGGGTGACCTTAACGGGTTACTTGAGGGGTTTTTTTTCTGAAA              | 21532                  | <i>g034</i>                                      |
| TAACAGTAAATGCCTCTTTCAATACGACTCACTATTGAGAGGGGCTTTATTCATTAAGG               | 24579                  | <i>g036</i>                                      |

**Table S9.** Predicted promoter and terminator sequences and locations of Yersinia phage fPS-26

| <b>Host RNAP promoters<br/>(-35 and -10 boxes)</b>                        | <b>5'-end<br/>pos.</b> | <b>Downstream gene (product)</b>                 |
|---------------------------------------------------------------------------|------------------------|--------------------------------------------------|
| TTGTTA (N) <sub>18</sub> CCTTATCTT                                        | 86                     | <i>g001</i> (hypothetical protein)               |
| TTAAAG (N) <sub>14</sub> TCTTAAAGT                                        | 654                    | <i>g001</i> (hypothetical protein)               |
| ATGGAA (N) <sub>12</sub> GCTTATTAT                                        | 972                    | <i>g002</i> (RNA polymerase), within <i>g001</i> |
| TTGCAG (N) <sub>18</sub> GGTATATT                                         | 1284                   | <i>g002</i> (RNA polymerase)                     |
|                                                                           |                        |                                                  |
| <b>Phage RNAP promoters</b>                                               |                        |                                                  |
| TAATACAACCTCACTATTGAGAGA                                                  | 576                    | <i>g001</i> (hypothetical protein)               |
| TAATAGAACCTCACTATTGGGAGC                                                  | 4068                   | <i>g003</i> (hypothetical protein)               |
| TAATACAACCTCACTATTGAGAAA                                                  | 4342                   | <i>g004</i> (hypothetical protein)               |
| TAATGGAACCTCACTATTGGGAGA                                                  | 6029                   | <i>g007</i> (phage protein)                      |
| TAATAGAACCTCACTATTGAGAAC                                                  | 7453                   | <i>g011</i> (ssDNA-binding protein)              |
| TAATAGAACCTCACTATTGGGAGA                                                  | 9119                   | <i>g014</i> (homing endonuclease)                |
| TAATACGACTCACTATTGAGAGG                                                   | 15934                  | <i>g024</i> (phage protein)                      |
| TAATACGACTCACTATTGGGAGA                                                   | 19345                  | <i>g031</i> (capsid protein)                     |
| TAATGCGACTCACTATTGGGAGA                                                   | 20330                  | <i>g032</i> (capsid protein)                     |
| CAATACGACTCACTATTGAGAGG                                                   | 24698                  | <i>g036</i> (core protein)                       |
| CAATACGACTCACTATTGGGAGT                                                   | 31993                  | <i>g040</i> (tail fiber protein)                 |
| TAATACGACTCACTATTGAGAGA                                                   | 38238                  | <i>g050</i> (phage protein)                      |
| <b>Consensus promoter</b>                                                 |                        |                                                  |
| TAATACGACTCACTATTGGGAGA                                                   |                        |                                                  |
|                                                                           |                        |                                                  |
| <b>Rho-independent terminators (hairpin stem in blue and loop in red)</b> |                        |                                                  |
| AGTAAACACATGGTCAACCTACGGGTGGCCTTTTTTCGTTTT                                | 5987                   | <i>g007</i>                                      |
| GACTCACTATTGGGAGACACATTATGTTTCCCTTTAGTTTTAAC                              | 19351                  | <i>g031</i>                                      |
| AACTATATGAAACCCCTTGGGTGACCTTAACGGGTACTTGAGGGGTTTTTTTTCTGAAA               | 21632                  | <i>g034</i>                                      |
| TAACAGTAAATGCCTCTTTCAATACGACTCACTATTGAGAGGGGCTTTATTCATTAAGG               | 24679                  | <i>g036</i>                                      |

**Table S10.** Predicted promoter and terminator sequences and locations of Yersinia phage fPS-50

| <b>Host RNAP promoters<br/>(-35 and -10 boxes)</b>                        | <b>5'-end<br/>pos.</b> | <b>Downstream gene (product)</b>                 |
|---------------------------------------------------------------------------|------------------------|--------------------------------------------------|
| TTGTTA (N) <sub>14</sub> CCTTATCTT                                        | 109                    | <i>g001</i> (hypothetical protein)               |
| ATGACA (N) <sub>13</sub> ATCTACAAG                                        | 413                    | <i>g001</i> (hypothetical protein)               |
| TTAAAG (N) <sub>9</sub> AGTCATACT                                         | 721                    | <i>g001</i> (hypothetical protein)               |
| ATGGAA (N) <sub>12</sub> GCTTATTAT                                        | 1107                   | <i>g002</i> (RNA polymerase), within <i>g001</i> |
| TTGCAG (N) <sub>18</sub> GGTTATATT                                        | 1419                   | <i>g002</i> (RNA polymerase)                     |
|                                                                           |                        |                                                  |
| <b>Phage RNAP promoters</b>                                               |                        |                                                  |
| TAATACAACCTCACTATTGAGAGA                                                  | 643                    | <i>g001</i> (hypothetical protein)               |
| TAATAGAACTCACTATTGGGAGC                                                   | 4203                   | <i>g003</i> (hypothetical protein)               |
| TAATACAACCTCACTATTGAGAAA                                                  | 4819                   | <i>g005</i> (hypothetical protein)               |
| TAATGGAACCTCACTATTGGGAGA                                                  | 6506                   | <i>g008</i> (phage protein)                      |
| TAATAGAACTCACTATTGAGAAC                                                   | 7930                   | <i>g012</i> (ssDNA-binding protein)              |
| TAATAGAACTCACTATTGGGAGA                                                   | 9596                   | <i>g015</i> (homing endonuclease)                |
| TAATACGACTCACTATTGAGAGG                                                   | 16414                  | <i>g025</i> (phage protein)                      |
| TAATACGACTCACTATTGGGAGA                                                   | 19818                  | <i>g030</i> (capsid protein)                     |
| TAATGCGACTCACTATTGGGAGA                                                   | 20803                  | <i>g031</i> (capsid protein)                     |
| CAATACGACTCACTATTGAGAGG                                                   | 25171                  | <i>g035</i> (core protein)                       |
| CAATACGACTCACTATTGGGAGT                                                   | 32466                  | <i>g039</i> (tail fiber protein)                 |
| TAATACGACTCACTATTGAGAGA                                                   | 38711                  | <i>g049</i> (phage protein)                      |
| <b>Consensus promoter</b>                                                 |                        |                                                  |
| TAATACGACTCACTATTGGGAGA                                                   |                        |                                                  |
|                                                                           |                        |                                                  |
| <b>Rho-independent terminators (hairpin stem in blue and loop in red)</b> |                        |                                                  |
| AGTAAACACATGGTCAACCTACGGGTGGCCTTTTTTCGTTTT                                | 6464                   | <i>g008</i>                                      |
| GACTCACTATTGGGAGACACTTTATGTTTCCCTTTAGTTTTAAC                              | 19824                  | <i>g030</i>                                      |
| AACTATATGAAACCCCTTGGGTGACCTTAACGGGTACTTGAGGGGTTTTTTTTCTGAAA               | 22105                  | <i>g033</i>                                      |
| TAACAGTAAATGCCTCTTCAATACGACTCACTATTGAGAGGGGCTTTATTCATTAAGG                | 25152                  | <i>g035</i>                                      |

**Table S11.** Predicted promoter and terminator sequences and locations of Yersinia phage fPS-52

| <b>Host RNAP promoters<br/>(-35 and -10 boxes)</b>                        | <b>5'-end<br/>pos.</b> | <b>Downstream gene (product)</b>                 |
|---------------------------------------------------------------------------|------------------------|--------------------------------------------------|
| TTGTTA (N) <sub>14</sub> CCTTATCTT                                        | 109                    | <i>g001</i> (hypothetical protein)               |
| TTAAAG (N) <sub>9</sub> AGTCATACT                                         | 677                    | <i>g001</i> (hypothetical protein)               |
| ATGGAA (N) <sub>12</sub> GCTTATTAT                                        | 1086                   | <i>g002</i> (RNA polymerase), within <i>g001</i> |
| TTGCAG (N) <sub>18</sub> GGTATATT                                         | 1398                   | <i>g002</i> (RNA polymerase)                     |
|                                                                           |                        |                                                  |
| <b>Phage RNAP promoters</b>                                               |                        |                                                  |
| TAATACAACCTCACTATTGAGAGA                                                  | 599                    | <i>g001</i> (hypothetical protein)               |
| TAATAGAACTCACTATTGGGAGC                                                   | 4182                   | <i>g003</i> (hypothetical protein)               |
| TAATACAACCTCACTATTGAGAAA                                                  | 4798                   | <i>g005</i> (hypothetical protein)               |
| TAATGGAACCTCACTATTGGGAGA                                                  | 6485                   | <i>g008</i> (phage protein)                      |
| TAATAGAACTCACTATTGAGAAC                                                   | 7909                   | <i>g012</i> (ssDNA-binding protein)              |
| TAATAGAACTCACTATTGGGAGA                                                   | 9575                   | <i>g015</i> (homing endonuclease)                |
| TAATACGACTCACTATTGAGAGG                                                   | 16390                  | <i>g025</i> (phage protein)                      |
| TAATACGACTCACTATTGGGAGA                                                   | 19794                  | <i>g030</i> (capsid protein)                     |
| TAATGCGACTCACTATTGGGAGA                                                   | 20779                  | <i>g031</i> (capsid protein)                     |
| CAATACGACTCACTATTGAGAGG                                                   | 25148                  | <i>g035</i> (core protein)                       |
| CAATACGACTCACTATTGGGAGT                                                   | 32443                  | <i>g039</i> (tail fiber protein)                 |
| TAATACGACTCACTATTGAGAGA                                                   | 38688                  | <i>g049</i> (phage protein)                      |
| <b>Consensus promoter</b>                                                 |                        |                                                  |
| TAATACGACTCACTATTGGGAGA                                                   |                        |                                                  |
|                                                                           |                        |                                                  |
| <b>Rho-independent terminators (hairpin stem in blue and loop in red)</b> |                        |                                                  |
| AGTAAACACATGGTCAACCTACGGGTGGCCTTTTTTCGTTTT                                | 6443                   | <i>g008</i>                                      |
| GACTCACTATTGGGAGACACTTTATGTTTCCCTTTAGTTTTAAC                              | 19800                  | <i>g030</i>                                      |
| AACTATATGAAACCCCTTGGGTGACCTTAACGGGTACTTGAGGGGTTTTTTTTCTGAA                | 22081                  | <i>g033</i>                                      |
| TAACAGTAAATGCCTCTTTCAATACGACTCACTATTGAGAGGGGCTTTATTCATTAAGG               | 25129                  | <i>g035</i>                                      |

**Table S12.** Predicted promoter and terminator sequences and locations of Yersinia phage fPS-53

| <b>Host RNAP promoters<br/>(-35 and -10 boxes)</b>                        | <b>5'-end<br/>pos.</b> | <b>Downstream gene (product)</b>                 |
|---------------------------------------------------------------------------|------------------------|--------------------------------------------------|
| TTGTTA (N) <sub>18</sub> CCTTATCTT                                        | 77                     | <i>g001</i> (hypothetical protein)               |
| TTAAAG (N) <sub>14</sub> TCTTAAAGT                                        | 614                    | <i>g001</i> (hypothetical protein)               |
| GTGATT (N) <sub>15</sub> CAGTATAC                                         | 915                    | <i>g002</i> (kinase), within <i>g001</i>         |
| TAGACA (N) <sub>15</sub> TGGTATACC                                        | 1260                   | <i>g003</i> (RNA polymerase), within <i>g002</i> |
| TTGAGA (N) <sub>9</sub> CCATATGAT                                         | 2154                   | <i>g003</i> (RNA polymerase)                     |
|                                                                           |                        |                                                  |
| <b>Phage RNAP promoters</b>                                               |                        |                                                  |
| TAATACAACCTCACTATTGAGAGA                                                  | 536                    | <i>g001</i> (hypothetical protein)               |
| TAATACAACCTCACTATTGAGAAA                                                  | 5064                   | <i>g004</i> (hypothetical protein)               |
| TAATGGAACCTCACTATTGGGAGA                                                  | 6751                   | <i>g007</i> (phage protein)                      |
| TAATAGAACTCACTATTGAGAAC                                                   | 8175                   | <i>g011</i> (ssDNA-binding protein)              |
| TAATAGAACTCACTATTGGGAGA                                                   | 9841                   | <i>g014</i> (homing endonuclease)                |
| TAATACGACTCACTATTGAGAGG                                                   | 17082                  | <i>g025</i> (phage protein)                      |
| TAATACGACTCACTATTGGGAGA                                                   | 20486                  | <i>g030</i> (capsid protein)                     |
| TAATGCGACTCACTATTGGGAGA                                                   | 21471                  | <i>g031</i> (capsid protein)                     |
| CAATACGACTCACTATTGAGAGG                                                   | 25838                  | <i>g035</i> (core protein)                       |
| CAATACGACTCACTATTGGGAGT                                                   | 33133                  | <i>g039</i> (tail fiber protein)                 |
| TAATACGACTCACTATTGAGAGA                                                   | 39609                  | <i>g049</i> (phage protein)                      |
| <b>Consensus promoter</b>                                                 |                        |                                                  |
| TAATACGACTCACTATTGGGAGA                                                   |                        |                                                  |
|                                                                           |                        |                                                  |
| <b>Rho-independent terminators (hairpin stem in blue and loop in red)</b> |                        |                                                  |
| AGTACACACATGGTCAACCTACGGGTGGCCTTTTTGCGTTTT                                | 6720                   | <i>g007</i>                                      |
| GACTCACTATTGGGAGACACTTTATGTTTCCCTTTAGTTTTAAC                              | 20503                  | <i>g030</i>                                      |
| AACTATATGAAACCCCTTGGGTGACCTTAACGGGTTACTTGAGGGGTTTTTTTCTGAAAG              | 22784                  | <i>g033</i>                                      |

**Table S13.** Predicted promoter and terminator sequences and locations of Yersinia phage fPS-54-ocr

| <b>Host RNAP promoters<br/>(-35 and -10 boxes)</b>                        | <b>5'-end<br/>pos.</b> | <b>Downstream gene (product)</b>                 |
|---------------------------------------------------------------------------|------------------------|--------------------------------------------------|
| TCCACA (N) <sub>14</sub> ACCTATAGT                                        | 49                     | <i>g001</i> (hypothetical protein)               |
| TTAAAG (N) <sub>15</sub> TCTTAAAGT                                        | 618                    | <i>g001</i> (hypothetical protein)               |
| GTGATT (N) <sub>15</sub> CAGTATACT                                        | 919                    | <i>g002</i> (kinase), within <i>g001</i>         |
| TAGACA (N) <sub>15</sub> TGGTATACC                                        | 1264                   | <i>g003</i> (RNA polymerase), within <i>g002</i> |
| TTTACA (N) <sub>18</sub> GATTATTAT                                        | 1623                   | <i>g003</i> (RNA polymerase), within <i>g002</i> |
| TTGAGA (N) <sub>14</sub> CCATATGAT                                        | 2158                   | <i>g003</i> (RNA polymerase)                     |
| <b>Phage RNAP promoters</b>                                               |                        |                                                  |
| TAATACAACCTCACTATTGAGAGA                                                  | 540                    | <i>g001</i> (hypothetical protein)               |
| TAATACAACCTCACTATTGAGAAA                                                  | 5068                   | <i>g004</i> (hypothetical protein)               |
| TAATGGAACCTCACTATTGGGAGA                                                  | 6755                   | <i>g007</i> (phage protein)                      |
| TAATAGAACTCACTATTGAGAAC                                                   | 8179                   | <i>g011</i> (ssDNA-binding protein)              |
| TAATAGAACTCACTATTGGGAGA                                                   | 9845                   | <i>g014</i> (homing endonuclease)                |
| TAATACGACTCACTATTGAGAGG                                                   | 17086                  | <i>g025</i> (phage protein)                      |
| TAATACGACTCACTATTGGGAGA                                                   | 20091                  | <i>g030</i> (capsid protein)                     |
| TAATGCGACTCACTATTGGGAGA                                                   | 21076                  | <i>g031</i> (capsid protein)                     |
| CAATACGACTCACTATTGAGAGG                                                   | 25454                  | <i>g035</i> (core protein)                       |
| CAATACGACTCACTATTGGGAGT                                                   | 32749                  | <i>g039</i> (tail fiber protein)                 |
| TAATACGACTCACTATTGAGAGA                                                   | 39233                  | <i>g049</i> (phage protein)                      |
| <b>Consensus promoter</b>                                                 |                        |                                                  |
| TAATACGACTCACTATTGAGAGA                                                   |                        |                                                  |
|                                                                           |                        |                                                  |
| <b>Rho-independent terminators (hairpin stem in blue and loop in red)</b> |                        |                                                  |
| AGTACACACATGGTCAACCTACGGGTGGCCTTTTTTCGTTTT                                | 6713                   | <i>g007</i>                                      |
| ACTCACTATTGGGAGACACTTTATGTTTCCTTTTAGTTTTAA                                | 20197                  | <i>g030</i>                                      |
| AACTATATGAAACCCCTTGGGTGACCTTAACGGGTTACTTGAGGGGTTTTTTTTTCTGAA              | 22477                  | <i>g033</i>                                      |
| ATTATGGAGTACCGTGACATCATGGTTTTTACGCTATG                                    | 25845                  | <i>g036</i>                                      |



**Table S14.** Predicted promoter and terminator sequences and locations of Yersinia phage fPS-59

| <b>Host RNAP promoters<br/>(-35 and -10 boxes)</b>                        | <b>5'-end<br/>pos.</b> | <b>Downstream gene (product)</b>                 |
|---------------------------------------------------------------------------|------------------------|--------------------------------------------------|
| CTCTCA (N) <sub>14</sub> ACCTATAGT                                        | 39                     | <i>g001</i> (hypothetical protein)               |
| TTTATA (N) <sub>16</sub> AGTCATACT                                        | 624                    | <i>g002</i> (hypothetical protein)               |
| GTGATT (N) <sub>15</sub> CAGTATACT                                        | 944                    | <i>g003</i> (RNA polymerase), within <i>g002</i> |
| TGGGAA (N) <sub>18</sub> AGTTATATT                                        | 1616                   | <i>g003</i> (RNA polymerase)                     |
|                                                                           |                        |                                                  |
| <b>Phage RNAP promoters</b>                                               |                        |                                                  |
| TAATACAACCTCACTATTGAGAGA                                                  | 576                    | <i>g002</i> (hypothetical protein)               |
| TAATACAACCTCACTATTGAGAAA                                                  | 4398                   | <i>g004</i> (hypothetical protein)               |
| TAATGGAACCTCACTATTGGGAGA                                                  | 6085                   | <i>g007</i> (phage protein)                      |
| TATTAGAACCTCACTATTGAGAAC                                                  | 7509                   | <i>g011</i> (ssDNA-binding protein)              |
| TATTAGAACCTCACTTTGGGAGA                                                   | 9666                   | <i>g015</i> (homing endonuclease)                |
| TAATACGACTCACTATTGAGAGG                                                   | 16897                  | <i>g027</i> (phage protein)                      |
| TAGTACGACTCACTATTGGGAGA                                                   | 19583                  | <i>g030</i> (capsid protein)                     |
| TAATGCGACTCACTATTGGGAGA                                                   | 20568                  | <i>g031</i> (capsid protein)                     |
| CAATACGACTCACTATTGAGAGG                                                   | 24935                  | <i>g035</i> (core protein)                       |
| CAACACGACTCACTATTGGGAGT                                                   | 32230                  | <i>g039</i> (tail fiber protein)                 |
| TAATACGACTCACTATTGAGAGA                                                   | 37557                  | <i>g046</i> (Phage protein)                      |
| <b>Consensus promoter</b>                                                 |                        |                                                  |
| TAATACGACTCACTATTGGGAGA                                                   |                        |                                                  |
|                                                                           |                        |                                                  |
| <b>Rho-independent terminators (hairpin stem in blue and loop in red)</b> |                        |                                                  |
| AGTACACACATGGTCAACCTACGGGTTGACCTTTTTGCGTTTT                               | 6043                   | <i>g007</i>                                      |
| GACTCACTATTGGGAGACACTTTATGTTTCCCTTTAGTTTTAAC                              | 19589                  | <i>g030</i>                                      |
| AACTATATGAAACCCCTTGGGTGACCTTAACGGGTTACTTGAGGGGTTTTTTTTCTGAAAG             | 21870                  | <i>g033</i>                                      |
| TAACAGTAAATGCCTCTTTCAATACGACTCACTATTGAGAGGGGCTTTATTCATTAAGG               | 24916                  | <i>g035</i>                                      |

**Table S15.** Predicted promoter and terminator sequences and locations of Yersinia phage fPS-64

| <b>Host RNAP promoters<br/>(-35 and -10 boxes)</b>                        | <b>5'-end<br/>pos.</b> | <b>Downstream gene (product)</b>                 |
|---------------------------------------------------------------------------|------------------------|--------------------------------------------------|
| TTGTTA (N) <sub>18</sub> CCTTATCTT                                        | 85                     | <i>g001</i> (hypothetical protein)               |
| CTGAGT (N) <sub>18</sub> GAGTATCAT                                        | 494                    | <i>g001</i> (hypothetical protein)               |
| TTAAAG (N) <sub>14</sub> TCTTAAAGT                                        | 808                    | <i>g001</i> (hypothetical protein)               |
| ATGGAA (N) <sub>12</sub> GCTTATTAT                                        | 1126                   | <i>g002</i> (RNA polymerase), within <i>g001</i> |
| TTGCAG (N) <sub>18</sub> GGTATATT                                         | 1438                   | <i>g002</i> (RNA polymerase)                     |
|                                                                           |                        |                                                  |
| <b>Phage RNAP promoters</b>                                               |                        |                                                  |
| TAATACAACCTCACTATTGAGAGA                                                  | 730                    | <i>g001</i> (hypothetical protein)               |
| TAATAGAACTCACTATTGGGAGC                                                   | 4222                   | <i>g003</i> (hypothetical protein)               |
| TAATACAACCTCACTATTGAGAAA                                                  | 4496                   | <i>g004</i> (hypothetical protein)               |
| TAATGGAACCTCACTATTGGGAGA                                                  | 6183                   | <i>g007</i> (Phage protein)                      |
| TAATAGAACTCACTATTGAGAAC                                                   | 7607                   | <i>g011</i> (ssDNA-binding protein)              |
| TAATAGAACTCACTATTGGGAGA                                                   | 9273                   | <i>g014</i> (homing endonuclease)                |
| TAATACGACTCACTATTGAGAGG                                                   | 16089                  | <i>g024</i> (phage protein)                      |
| TAATACGACTCACTATTGGGAGA                                                   | 19500                  | <i>g031</i> (capsid protein)                     |
| TAATGCGACTCACTATTGGGAGA                                                   | 20485                  | <i>g032</i> (capsid protein)                     |
| CAATACGACTCACTATTGAGAGG                                                   | 24854                  | <i>g036</i> (core protein)                       |
| CAATACGACTCACTATTGGGAGT                                                   | 32149                  | <i>g040</i> (phage tail fiber)                   |
| TAATACGACTCACTATTGAGAGA                                                   | 38394                  | <i>g050</i> (phage protein)                      |
| <b>Consensus promoter</b>                                                 |                        |                                                  |
| TAATACGACTCACTATTGGGAGA                                                   |                        |                                                  |
|                                                                           |                        |                                                  |
| <b>Rho-independent terminators (hairpin stem in blue and loop in red)</b> |                        |                                                  |
| AGTAAACACATGGTCAACCTACGGGTTGGCCTTTTTGCGTTTT                               | 6141                   | <i>g007</i>                                      |
| GACTCACTATTGGGAGACACATTATGTTTCCCTTTAGTTTTAAC                              | 19805                  | <i>g031</i>                                      |
| AACTATATGAAACCCCTTGGGTGACCTTAACGGGTTACTTGAGGGGTTTTTTTTTCTGAA              | 22086                  | <i>g034</i>                                      |
| TAACAGTAAATGCCTCTTCAATACGACTCACTATTGAGAGGGGCTTTATTCATTAAGG                | 24835                  | <i>g036</i>                                      |

**Table S16.** Predicted promoter and terminator sequences and locations of Yersinia phage fPS-85

| <b>Host RNAP promoters<br/>(-35 and -10 boxes)</b>                        | <b>5'-end<br/>pos.</b> | <b>Downstream gene (product)</b>                 |
|---------------------------------------------------------------------------|------------------------|--------------------------------------------------|
| TTGTTA (N) <sub>18</sub> CCTTATCTT                                        | 77                     | <i>g001</i> (hypothetical protein)               |
| TTAAAG (N) <sub>14</sub> TCTTAAAGT                                        | 614                    | <i>g001</i> (hypothetical protein)               |
| GTGATT (N) <sub>15</sub> CAGTATACT                                        | 915                    | <i>g002</i> (kinase), within <i>g001</i>         |
| TAGACA (N) <sub>15</sub> TGGTATACC                                        | 1260                   | <i>g003</i> (RNA polymerase), within <i>g002</i> |
| TTGAGA (N) <sub>14</sub> CCATATGAT                                        | 2154                   | <i>g003</i> (RNA polymerase)                     |
|                                                                           |                        |                                                  |
| <b>Phage RNAP promoters</b>                                               |                        |                                                  |
| TAATACAACCTCACTATTGAGAGA                                                  | 536                    | <i>g001</i> (hypothetical protein)               |
| TAATACAACCTCACTATTGAGAAA                                                  | 5064                   | <i>g004</i> (hypothetical protein)               |
| TAATGGAACCTCACTATTGGGAGA                                                  | 6751                   | <i>g007</i> (phage protein)                      |
| TAATAGAACTCACTATTGAGAAC                                                   | 8175                   | <i>g011</i> (ssDNA-binding protein)              |
| TAATAGAACTCACTATTGGGAGA                                                   | 9841                   | <i>g014</i> (primase/helicase)                   |
| TAATACGACTCACTATTGAGAGG                                                   | 17082                  | <i>g024</i> (phage protein)                      |
| TAATACGACTCACTATTGGGAGA                                                   | 20486                  | <i>g029</i> (capsid protein)                     |
| TAATGCGACTCACTATTGGGAGA                                                   | 21471                  | <i>g030</i> (capsid protein)                     |
| CAATACGACTCACTATTGAGAGG                                                   | 25838                  | <i>g034</i> (core protein)                       |
| CAATACGACTCACTATTGGGAGT                                                   | 33133                  | <i>g038</i> (phage tail fiber)                   |
| TAATACGACTCACTATTGAGAGA                                                   | 39609                  | <i>g048</i> (phage protein)                      |
| <b>Consensus promoter</b>                                                 |                        |                                                  |
| TAATACGACTCACTATTGGGAGA                                                   |                        |                                                  |
|                                                                           |                        |                                                  |
| <b>Rho-independent terminators (hairpin stem in blue and loop in red)</b> |                        |                                                  |
| AGTACACACATGGTCAACCTACGGGTGGCCTTTTTTCGTTTT                                | 6410                   | <i>g007</i>                                      |
| GACTCACTATTGGGAGACACTTTATGTTTCCCTTTAGTTTTAAC                              | 20193                  | <i>g029</i>                                      |
| AACATATGAAACCCCTTGGGTGACCTTAACGGGTACTTGAGGGGTTTTTTCTGAAAG                 | 22474                  | <i>g032</i>                                      |

**Table S17.** Predicted promoter and terminator sequences and locations of Yersinia phage fPS-86

| <b>Host RNAP promoters<br/>(-35 and -10 boxes)</b>                        | <b>5'-end<br/>pos.</b> | <b>Downstream gene (product)</b>                 |
|---------------------------------------------------------------------------|------------------------|--------------------------------------------------|
| TTGTTA (N) <sub>18</sub> CCTTATCTT                                        | 96                     | <i>g001</i> (hypothetical protein)               |
| TTAAAG (N) <sub>14</sub> TCTTAAAGT                                        | 584                    | <i>g001</i> (hypothetical protein)               |
| ATGGAA (N) <sub>12</sub> GCTTATTAT                                        | 902                    | <i>g002</i> (RNA polymerase), within <i>g001</i> |
| TTGCAG (N) <sub>18</sub> GGTATATT                                         | 1214                   | <i>g002</i> (RNA polymerase)                     |
|                                                                           |                        |                                                  |
| <b>Phage RNAP promoters</b>                                               |                        |                                                  |
| TAATACAACCTCACTATTGAGAGA                                                  | 506                    | <i>g001</i> (hypothetical protein)               |
| TAATAGAACCTCACTATTGGGAGC                                                  | 3998                   | <i>g003</i> (hypothetical protein)               |
| TAATACAACCTCACTATTGAGAAA                                                  | 4272                   | <i>g004</i> (hypothetical protein)               |
| TAATGGAACCTCACTATTGGGAGA                                                  | 5959                   | <i>g007</i> (Phage protein)                      |
| TAATAGAACCTCACTATTGAGAAC                                                  | 7383                   | <i>g011</i> (ssDNA-binding protein)              |
| TAATAGAACCTCACTATTGGGAGA                                                  | 9049                   | <i>g014</i> (homing endonuclease)                |
| TAATACGACTCACTATTGAGAGG                                                   | 15863                  | <i>g024</i> (phage protein)                      |
| TAATACGACTCACTATTGGGAGA                                                   | 19274                  | <i>g031</i> (capsid protein)                     |
| TAATGCGACTCACTATTGGGAGA                                                   | 20259                  | <i>g032</i> (capsid protein)                     |
| CAATACGACTCACTATTGAGAGG                                                   | 24626                  | <i>g036</i> (core protein)                       |
| CAATACGACTCACTATTGGGAGT                                                   | 31921                  | <i>g040</i> (tail fiber protein)                 |
| TAATACGACTCACTATTGAGAGA                                                   | 38166                  | <i>g050</i> (phage protein)                      |
| <b>Consensus promoter</b>                                                 |                        |                                                  |
| TAATACGACTCACTATTGGGAGA                                                   |                        |                                                  |
|                                                                           |                        |                                                  |
| <b>Rho-independent terminators (hairpin stem in blue and loop in red)</b> |                        |                                                  |
| AGTAAACACATGGTCAACCTACGGGTTGGCCTTTTTGCGTTTT                               | 5917                   | <i>g007</i>                                      |
| GACTCACTATTGGGAGACACATTATGTTTCCCTTTAGTTTTAAC                              | 19280                  | <i>g031</i>                                      |
| AACTATATGAAACCCCTTGGGTGACCTTAACGGGTTACTTGAGGGGTTTTTTTCTGAAAG              | 21561                  | <i>g034</i>                                      |
| TAACAGTAAATGCCTCTTTCAATACGACTCACTATTGAGAGGGGCTTTATTCATTAAGG               | 24607                  | <i>g036</i>                                      |

**Table S18.** Predicted promoter and terminator sequences and locations of Yersinia phage fPS-89

| <b>Host RNAP promoters<br/>(-35 and -10 boxes)</b>                        | <b>5'-end<br/>pos.</b> | <b>Downstream gene (product)</b>                 |
|---------------------------------------------------------------------------|------------------------|--------------------------------------------------|
| TTGTTA (N) <sub>18</sub> CCTTATCTT                                        | 76                     | <i>g001</i> (hypothetical protein)               |
| TTAAAG (N) <sub>14</sub> TCTTAAAGT                                        | 569                    | <i>g001</i> (hypothetical protein)               |
| GTGATT (N) <sub>15</sub> CAGTATACT                                        | 870                    | <i>g002</i> (kinase), within <i>g001</i>         |
| TAGACA (N) <sub>15</sub> TGGTATACC                                        | 1215                   | <i>g003</i> (RNA polymerase), within <i>g002</i> |
| TTGAGA (N) <sub>15</sub> CCATATGAT                                        | 2109                   | <i>g003</i> (RNA polymerase)                     |
|                                                                           |                        |                                                  |
| <b>Phage RNAP promoters</b>                                               |                        |                                                  |
| TAATACAACCTCACTATTGAGAGA                                                  | 491                    | <i>g001</i> (hypothetical protein)               |
| TAATACAACCTCACTATTGAGAAA                                                  | 5019                   | <i>g004</i> (hypothetical protein)               |
| TAATGGAACCTCACTATTGGGAGA                                                  | 6706                   | <i>g007</i> (phage protein)                      |
| TAATAGAACTCACTATTGAGAAC                                                   | 8130                   | <i>g011</i> (ssDNA-binding protein)              |
| TAATAGAACTCACTATTGGGAGA                                                   | 9796                   | <i>g014</i> (homing endonuclease)                |
| TAATACGACTCACTATTGAGAGG                                                   | 17037                  | <i>g025</i> (phage protein)                      |
| TAATACGACTCACTATTGGGAGA                                                   | 20441                  | <i>g030</i> (capsid protein)                     |
| TAATGCGACTCACTATTGGGAGA                                                   | 21426                  | <i>g031</i> (capsid protein)                     |
| CAATACGACTCACTATTGAGAGG                                                   | 25793                  | <i>g035</i> (core protein)                       |
| CAATACGACTCACTATTGGGAGT                                                   | 33088                  | <i>g039</i> (tail fiber protein)                 |
| TAATACGACTCACTATTGAGAGA                                                   | 39564                  | <i>g049</i> (phage protein)                      |
| <b>Consensus promoter</b>                                                 |                        |                                                  |
| TAATACGACTCACTATTGGGAGA                                                   |                        |                                                  |
|                                                                           |                        |                                                  |
| <b>Rho-independent terminators (hairpin stem in blue and loop in red)</b> |                        |                                                  |
| AGTACACACATGGTCAACCTACGGGTGGCCTTTTTGCGTTTT                                | 6664                   | <i>g007</i>                                      |
| GACTCACTATTGGGAGACACTTTATGTTTCCCTTTAGTTTTAAC                              | 20447                  | <i>g030</i>                                      |
| AACATATGAAACCCCTTGGGTGACCTTAACGGGTACTTGAGGGGTTTTTTCTGAAAG                 | 22728                  | <i>g033</i>                                      |

**Table S19.** Repeats in the fPS-phage genomes between left TR and phage promoter P1. See Figure S3.

| Phage      | Rep1 <sup>a</sup> | Rep2 <sup>b</sup> | Rep3 <sup>c</sup> | Rep4 <sup>d</sup> | Sum |
|------------|-------------------|-------------------|-------------------|-------------------|-----|
| fPS-50     | 9                 | 0                 | 6                 | 0                 | 15  |
| fPS-52     | 11                | 1                 | 5                 | 0                 | 17  |
| fPS-21     | 3                 | 2                 | 6                 | 0                 | 11  |
| fPS-16     | 3                 | 2                 | 6                 | 0                 | 11  |
| fPS-9      | 6                 | 0                 | 10                | 0                 | 16  |
| fPS-64     | 26                | 4                 | 4                 | 0                 | 34  |
| fPS-10     | 9                 | 0                 | 16                | 0                 | 25  |
| fPS-26     | 16                | 0                 | 4                 | 0                 | 20  |
| fPS-19     | 3                 | 2                 | 6                 | 0                 | 11  |
| fPS-7      | 3                 | 3                 | 5                 | 0                 | 11  |
| fPS-86     | 5                 | 1                 | 7                 | 0                 | 13  |
| fPS-53     | 5                 | 0                 | 13                | 0                 | 18  |
| fPS-85     | 5                 | 0                 | 13                | 0                 | 18  |
| fPS-89     | 2                 | 0                 | 11                | 0                 | 13  |
| fPS-54-ocr | 5                 | 0                 | 13                | 0                 | 18  |
| fPS-59     | 11                | 0                 | 0                 | 7                 | 18  |

<sup>a</sup> Rep1 ACCACTGAGTA  
<sup>b</sup> Rep2 ACCATTGAGTA  
<sup>c</sup> Rep3 TCATTGAGTA  
<sup>d</sup> Rep4 TCATTAAAGGA

**Table S20.** Repeats in the fPS-phage genomes between right TR and phage promoter P12. See Figure S3.

| Phage      | Rep5 <sup>a</sup> | Rep6 <sup>b</sup> | Rep7 <sup>c</sup> | Rep8 <sup>d</sup> | Rep9 <sup>e</sup> | Rep10 <sup>f</sup> | Sum |
|------------|-------------------|-------------------|-------------------|-------------------|-------------------|--------------------|-----|
| fPS-50     | 5                 | 1                 | 0                 | 2                 | 0                 | 1                  | 9   |
| fPS-52     | 9                 | 6                 | 0                 | 2                 | 0                 | 1                  | 18  |
| fPS-21     | 0                 | 1                 | 0                 | 2                 | 0                 | 1                  | 4   |
| fPS-16     | 4                 | 0                 | 0                 | 1                 | 0                 | 3                  | 8   |
| fPS-9      | 3                 | 0                 | 0                 | 0                 | 0                 | 2                  | 5   |
| fPS-64     | 0                 | 3                 | 0                 | 8                 | 0                 | 5                  | 16  |
| fPS-10     | 4                 | 0                 | 0                 | 0                 | 0                 | 2                  | 6   |
| fPS-26     | 0                 | 1                 | 0                 | 4                 | 0                 | 3                  | 8   |
| fPS-19     | 2                 | 1                 | 0                 | 1                 | 0                 | 1                  | 5   |
| fPS-7      | 4                 | 0                 | 0                 | 0                 | 0                 | 2                  | 6   |
| fPS-86     | 0                 | 2                 | 0                 | 4                 | 0                 | 2                  | 8   |
| fPS-53     | 0                 | 0                 | 4                 | 4                 | 0                 | 0                  | 8   |
| fPS-85     | 0                 | 0                 | 3                 | 3                 | 0                 | 0                  | 6   |
| fPS-89     | 0                 | 0                 | 4                 | 4                 | 0                 | 0                  | 8   |
| fPS-54-ocr | 0                 | 0                 | 4                 | 4                 | 0                 | 0                  | 8   |
| fPS-59     | 0                 | 3                 | 0                 | 0                 | 3                 | 0                  | 6   |

<sup>a</sup> Rep5 CTCTAAGGAT  
<sup>b</sup> Rep6 ACCTAATGGTA  
<sup>c</sup> Rep7 GATGTACTCTAAGATACCTAAT  
<sup>d</sup> Rep8 ACTCTAAGATACCTAAT  
<sup>e</sup> Rep9 TACCTAATGGTACTTGAAGA  
<sup>f</sup> Rep10 ACCTAATGATGCA
